# Supplementary material
Source: publisher figshare collection journal article supplement (https://gsajournals.figshare.com/ndownloader/files/14515370)
Supplement: Supplementary file 1 [file 14515370]

## Sheet: Sheet1
Sarcophaga bullata	Lucilia cuprina	Drosophila melanogaster	Anopheles gambiae	Mayetiola destructor	Aedes aegypti	Musca domestica	Glossina morsitans
sBull_maker-Contig_200-snap-gene-2.9-mRNA-1	lCup_FF38_10293	dMel_NP_650067.1	aGamb_XP_309484.3	mDest_augustus_masked-A2.12-abinit-gene-2.3-mRNA-1	aAeg_AAEL004427-PA	mDom_gi|557756844|ref|XP_005178157.1	gMor_GMOY007582_PA
sBull_maker-Contig_214-snap-gene-1.50-mRNA-1	lCup_FF38_10250	dMel_NP_572778.1	aGamb_XP_315646.3	mDest_maker-X2.17-augustus-gene-6.56-mRNA-1	aAeg_AAEL010588-PA	mDom_gi|557757040|ref|XP_005178253.1	gMor_GMOY006161_PA
sBull_maker-Contig_152-augustus-gene-1.66-mRNA-1	lCup_FF38_00874	dMel_NP_573084.1	aGamb_XP_318585.4	mDest_maker-X2.13-snap-gene-1.1-mRNA-1	aAeg_AAEL005395-PA	mDom_gi|557782073|ref|XP_005190652.1	gMor_GMOY006643_PA
sBull_maker-Contig_162-snap-gene-1.35-mRNA-1	lCup_FF38_02698	dMel_NP_511117.1	aGamb_XP_312670.1	mDest_maker-X2.17-augustus-gene-13.78-mRNA-1	aAeg_AAEL007790-PA	mDom_gi|557767183|ref|XP_005183282.1	gMor_GMOY003044_PA
sBull_maker-Contig_35-augustus-gene-5.2-mRNA-1	lCup_FF38_14341	dMel_NP_524867.2	aGamb_XP_310192.3	mDest_maker-A1.41-augustus-gene-13.48-mRNA-1	aAeg_AAEL007697-PA	mDom_gi|557761019|ref|XP_005180229.1	gMor_GMOY004181_PA
sBull_maker-Contig_35-snap-gene-6.10-mRNA-1	lCup_FF38_03912	dMel_NP_609205.1	aGamb_XP_317346.3	mDest_augustus_masked-Un.16534-abinit-gene-2.18-mRNA-1	aAeg_AAEL006299-PA	mDom_gi|557776239|ref|XP_005187763.1	gMor_GMOY011016_PA
sBull_maker-Contig_35-augustus-gene-7.0-mRNA-1	lCup_FF38_03918	dMel_NP_609204.2	aGamb_XP_319154.4	mDest_maker-Un.12868-augustus-gene-0.18-mRNA-1	aAeg_AAEL005457-PA	mDom_gi|557776235|ref|XP_005187761.1	gMor_GMOY011017_PA
sBull_maker-Contig_393-snap-gene-0.25-mRNA-1	lCup_FF38_14438	dMel_NP_477365.1	aGamb_XP_558416.3	mDest_maker-Un.16290-augustus-gene-0.6-mRNA-1	aAeg_AAEL011440-PA	mDom_gi|557761482|ref|XP_005180459.1	gMor_GMOY001373_PA
sBull_maker-Contig_393-snap-gene-0.28-mRNA-1	lCup_FF38_14445	dMel_NP_572836.1	aGamb_XP_311995.4	mDest_maker-A2.6-augustus-gene-3.48-mRNA-1	aAeg_AAEL000003-PA	mDom_gi|557776089|ref|XP_005187688.1	gMor_GMOY000849_PA
sBull_maker-Contig_5298-augustus-gene-0.2-mRNA-1	lCup_FF38_04897	dMel_NP_001014529.1	aGamb_XP_315334.4	mDest_maker-A2.7-augustus-gene-7.64-mRNA-1	aAeg_AAEL012260-PA	mDom_gi|557755754|ref|XP_005177615.1	gMor_GMOY001047_PA
sBull_snap_masked-Contig_18988-processed-gene-0.0-mRNA-1	lCup_FF38_09981	dMel_NP_523713.2	aGamb_XP_308376.4	mDest_augustus_masked-X1.7-abinit-gene-75.24-mRNA-1	aAeg_AAEL009295-PA	mDom_gi|557768171|ref|XP_005183770.1	gMor_GMOY006705_PA
sBull_augustus_masked-Contig_25068-processed-gene-0.0-mRNA-1	lCup_FF38_08953	dMel_NP_572246.1	aGamb_XP_562163.4	mDest_augustus_masked-Un.16430-abinit-gene-2.8-mRNA-1	aAeg_AAEL013393-PA	mDom_gi|557772433|ref|XP_005185873.1	gMor_GMOY008610_PA
sBull_maker-Contig_136-snap-gene-2.54-mRNA-1	lCup_FF38_11032	dMel_NP_649230.1	aGamb_XP_320583.3	mDest_maker-X1.4-snap-gene-11.57-mRNA-1	aAeg_AAEL003443-PA	mDom_gi|557769298|ref|XP_005184323.1	gMor_GMOY000081_PA
sBull_maker-Contig_145-snap-gene-3.3-mRNA-1	lCup_FF38_11928	dMel_NP_651191.1	aGamb_XP_313856.5	mDest_maker-A1.29-augustus-gene-18.91-mRNA-1	aAeg_AAEL004877-PA	mDom_gi|557776568|ref|XP_005187923.1	gMor_GMOY003136_PA
sBull_maker-Contig_234-snap-gene-2.1-mRNA-1	lCup_FF38_06735	dMel_NP_730096.2	aGamb_XP_316127.4	mDest_maker-X1.7-snap-gene-66.43-mRNA-1	aAeg_AAEL000104-PA	mDom_gi|755861079|ref|XP_011290569.1	gMor_GMOY003468_PA
sBull_maker-Contig_1110-snap-gene-0.1-mRNA-1	lCup_FF38_13898	dMel_NP_524919.2	aGamb_XP_310424.4	mDest_maker-A1.47-augustus-gene-5.68-mRNA-1	aAeg_AAEL008465-PA	mDom_gi|557772671|ref|XP_005185990.1	gMor_GMOY005981_PA
sBull_maker-Contig_163-snap-gene-0.31-mRNA-1	lCup_FF38_11954	dMel_NP_648776.1	aGamb_XP_320569.3	mDest_augustus_masked-A2.3-abinit-gene-2.6-mRNA-1	aAeg_AAEL006343-PA	mDom_gi|557753961|ref|XP_005176725.1	gMor_GMOY006003_PA
sBull_maker-Contig_163-snap-gene-0.29-mRNA-1	lCup_FF38_11960	dMel_NP_524026.1	aGamb_XP_557018.3	mDest_maker-A1.3-augustus-gene-3.48-mRNA-1	aAeg_AAEL012202-PA	mDom_gi|755851810|ref|XP_011292974.1	gMor_GMOY012362_PA
sBull_maker-Contig_163-snap-gene-1.0-mRNA-1	lCup_FF38_11955	dMel_NP_648779.1	aGamb_XP_320556.4	mDest_maker-X2.17-snap-gene-16.3-mRNA-1	aAeg_AAEL006337-PA	mDom_gi|557753963|ref|XP_005176726.1	gMor_GMOY013274_PA
sBull_maker-Contig_163-snap-gene-3.39-mRNA-1	lCup_FF38_00683	dMel_NP_648507.1	aGamb_XP_311503.4	mDest_augustus_masked-Un.16430-abinit-gene-10.14-mRNA-1	aAeg_AAEL006760-PA	mDom_gi|755857863|ref|XP_005177668.2	gMor_GMOY000294_PA
sBull_maker-Contig_11674-augustus-gene-0.10-mRNA-1	lCup_FF38_03204	dMel_NP_477080.1	aGamb_XP_315787.4	mDest_maker-X1Random.3-augustus-gene-11.49-mRNA-1	aAeg_AAEL018160-PA	mDom_gi|557750169|ref|XP_005174848.1	gMor_GMOY000139_PA
sBull_maker-Contig_335-augustus-gene-0.27-mRNA-1	lCup_FF38_02119	dMel_NP_573025.2	aGamb_XP_310737.5	mDest_maker-A1.32-augustus-gene-10.116-mRNA-1	aAeg_AAEL004064-PA	mDom_gi|755876823|ref|XP_011292766.1	gMor_GMOY000012_PA
sBull_maker-Contig_335-augustus-gene-1.26-mRNA-1	lCup_FF38_02127	dMel_NP_523429.1	aGamb_XP_313594.4	mDest_maker-A1.27-snap-gene-4.85-mRNA-1	aAeg_AAEL009912-PA	mDom_gi|557768769|ref|XP_005184061.1	gMor_GMOY007242_PA
sBull_maker-Contig_335-augustus-gene-1.24-mRNA-1	lCup_FF38_02120	dMel_NP_572437.2	aGamb_XP_001237316.2	mDest_maker-X1Random.2-augustus-gene-27.50-mRNA-1	aAeg_AAEL008014-PA	mDom_gi|557772961|ref|XP_005186134.1	gMor_GMOY000170_PA
sBull_maker-Contig_505-augustus-gene-0.18-mRNA-1	lCup_FF38_04642	dMel_NP_649008.2	aGamb_XP_315620.4	mDest_maker-X1Random.2-augustus-gene-15.47-mRNA-1	aAeg_AAEL001275-PA	mDom_gi|755875420|ref|XP_011292568.1	gMor_GMOY002376_PA
sBull_maker-Contig_737-snap-gene-0.29-mRNA-1	lCup_FF38_09404	dMel_NP_608521.1	aGamb_XP_317779.3	mDest_augustus_masked-Un.1274-abinit-gene-0.0-mRNA-1	aAeg_AAEL003510-PA	mDom_gi|557773496|ref|XP_005186401.1	gMor_GMOY001507_PA
sBull_maker-Contig_137-augustus-gene-2.5-mRNA-1	lCup_FF38_13838	dMel_NP_612042.3	aGamb_XP_315708.4	mDest_maker-Un.17701-augustus-gene-0.5-mRNA-1	aAeg_AAEL010027-PA	mDom_gi|557773133|ref|XP_005186220.1	gMor_GMOY007784_PA
sBull_augustus_masked-Contig_166-processed-gene-0.39-mRNA-1	lCup_FF38_04011	dMel_NP_650056.1	aGamb_XP_310387.5	mDest_maker-A2Random.1-augustus-gene-1.35-mRNA-1	aAeg_AAEL000042-PA	mDom_gi|557773101|ref|XP_005186204.1	gMor_GMOY011131_PA
sBull_maker-Contig_166-snap-gene-1.15-mRNA-1	lCup_FF38_04028	dMel_NP_524377.1	aGamb_XP_311841.2	mDest_maker-Un.19322-augustus-gene-3.68-mRNA-1	aAeg_AAEL014368-PA	mDom_gi|557774311|ref|XP_005186805.1	gMor_GMOY011109_PA
sBull_maker-Contig_11046-augustus-gene-0.5-mRNA-1	lCup_FF38_10856	dMel_NP_648669.1	aGamb_XP_320644.4	mDest_maker-X1.1-augustus-gene-29.26-mRNA-1	aAeg_AAEL008583-PA	mDom_gi|755875083|ref|XP_011292515.1	gMor_GMOY000346_PA
sBull_maker-Contig_24-snap-gene-2.87-mRNA-1	lCup_FF38_05243	dMel_NP_650208.1	aGamb_XP_311309.5	mDest_maker-X1.7-augustus-gene-13.89-mRNA-1	aAeg_AAEL011389-PA	mDom_gi|557781268|ref|XP_005190253.1	gMor_GMOY007479_PC
sBull_augustus_masked-Contig_24-processed-gene-2.47-mRNA-1	lCup_FF38_05232	dMel_NP_732900.1	aGamb_XP_307890.5	mDest_maker-A2Random.62-snap-gene-12.1-mRNA-1	aAeg_AAEL009311-PA	mDom_gi|557769807|ref|XP_005184575.1	gMor_GMOY002499_PA
sBull_maker-Contig_24-augustus-gene-6.1-mRNA-1	lCup_FF38_10986	dMel_NP_660192.1	aGamb_XP_316141.4	mDest_augustus_masked-X1Random.2-abinit-gene-22.5-mRNA-1	aAeg_AAEL013382-PA	mDom_gi|755878270|ref|XP_005184677.2	gMor_GMOY003217_PA
sBull_snap_masked-Contig_24-processed-gene-6.20-mRNA-1	lCup_FF38_10988	dMel_NP_647814.1	aGamb_XP_315795.4	mDest_augustus_masked-X1Random.2-abinit-gene-22.6-mRNA-1	aAeg_AAEL001757-PA	mDom_gi|557769998|ref|XP_005184670.1	gMor_GMOY004514_PA
sBull_snap_masked-Contig_24-processed-gene-7.29-mRNA-1	lCup_FF38_10983	dMel_NP_648431.3	aGamb_XP_315444.4	mDest_maker-X1.7-augustus-gene-68.85-mRNA-1	aAeg_AAEL009738-PA	mDom_gi|557781436|ref|XP_005190337.1	gMor_GMOY004944_PA
sBull_augustus_masked-Contig_42-processed-gene-3.6-mRNA-1	lCup_FF38_07304	dMel_NP_648047.2	aGamb_XP_564671.2	mDest_snap_masked-X1.7-abinit-gene-70.22-mRNA-1	aAeg_AAEL008491-PA	mDom_gi|557770589|ref|XP_005184958.1	gMor_GMOY001838_PA
sBull_augustus_masked-Contig_19218-processed-gene-0.6-mRNA-1	lCup_FF38_02648	dMel_NP_476927.1	aGamb_XP_314012.3	mDest_snap_masked-X2.8-abinit-gene-20.39-mRNA-1	aAeg_AAEL014904-PA	mDom_gi|557765463|ref|XP_005182432.1	gMor_GMOY008299_PA
sBull_maker-Contig_862-augustus-gene-0.0-mRNA-1	lCup_FF38_04522	dMel_NP_652101.2	aGamb_XP_317011.3	mDest_augustus_masked-Un.17588-abinit-gene-12.15-mRNA-1	aAeg_AAEL005032-PA	mDom_gi|557775386|ref|XP_005187339.1	gMor_GMOY002188_PA
sBull_maker-Contig_31-snap-gene-0.2-mRNA-1	lCup_FF38_04534	dMel_NP_477132.1	aGamb_XP_309174.2	mDest_maker-X1.7-snap-gene-105.59-mRNA-1	aAeg_AAEL011358-PA	mDom_gi|755852226|ref|XP_005175809.2	gMor_GMOY008834_PA
sBull_maker-Contig_31-augustus-gene-7.50-mRNA-1	lCup_FF38_04146	dMel_NP_649495.1	aGamb_XP_321854.5	mDest_augustus_masked-Un.21950-abinit-gene-3.14-mRNA-1	aAeg_AAEL001340-PA	mDom_gi|755888274|ref|XP_005188270.2	gMor_GMOY002666_PA
sBull_maker-Contig_81-snap-gene-1.13-mRNA-1	lCup_FF38_02796	dMel_NP_650553.1	aGamb_XP_316798.3	mDest_maker-A1.33-snap-gene-10.72-mRNA-1	aAeg_AAEL008425-PA	mDom_gi|557775320|ref|XP_005187306.1	gMor_GMOY001097_PA
sBull_maker-Contig_1280-snap-gene-0.21-mRNA-1	lCup_FF38_07877	dMel_NP_524734.2	aGamb_XP_313021.5	mDest_maker-A1.41-augustus-gene-1.33-mRNA-1	aAeg_AAEL010401-PA	mDom_gi|557781266|ref|XP_005190252.1	gMor_GMOY011815_PA
sBull_maker-Contig_1280-snap-gene-0.26-mRNA-1	lCup_FF38_07862	dMel_NP_649602.2	aGamb_XP_309087.4	mDest_maker-X1Random.1-augustus-gene-18.33-mRNA-1	aAeg_AAEL005075-PA	mDom_gi|557781278|ref|XP_005190258.1	gMor_GMOY007478_PA
sBull_maker-Contig_1280-augustus-gene-0.39-mRNA-1	lCup_FF38_07868	dMel_NP_650987.1	aGamb_XP_311310.1	mDest_augustus_masked-A1.28-abinit-gene-6.6-mRNA-1	aAeg_AAEL011388-PA	mDom_gi|557774672|ref|XP_005186983.1	gMor_GMOY008465_PA
sBull_augustus_masked-Contig_59-processed-gene-2.8-mRNA-1	lCup_FF38_11501	dMel_NP_611084.2	aGamb_XP_314054.3	mDest_snap_masked-X1Random.8-abinit-gene-12.43-mRNA-1	aAeg_AAEL013142-PA	mDom_gi|557781787|ref|XP_005190511.1	gMor_GMOY006196_PA
sBull_maker-Contig_298-augustus-gene-1.1-mRNA-1	lCup_FF38_13562	dMel_NP_649826.3	aGamb_XP_551697.4	mDest_augustus_masked-Un.18316-abinit-gene-0.3-mRNA-1	aAeg_AAEL011134-PA	mDom_gi|755868857|ref|XP_011291611.1	gMor_GMOY011658_PA
sBull_maker-Contig_298-snap-gene-1.49-mRNA-1	lCup_FF38_13570	dMel_NP_650694.2	aGamb_XP_311825.5	mDest_maker-A1.41-augustus-gene-20.28-mRNA-1	aAeg_AAEL004455-PA	mDom_gi|557775691|ref|XP_005187490.1	gMor_GMOY006798_PA
sBull_maker-Contig_3-snap-gene-10.10-mRNA-1	lCup_FF38_04664	dMel_NP_476656.1	aGamb_XP_319131.4	mDest_maker-A1.47-augustus-gene-12.101-mRNA-1	aAeg_AAEL009421-PA	mDom_gi|557771164|ref|XP_005185244.1	gMor_GMOY012204_PA
sBull_maker-Contig_3-snap-gene-11.20-mRNA-1	lCup_FF38_04118	dMel_NP_609333.1	aGamb_XP_553696.3	mDest_snap_masked-Un.8076-abinit-gene-0.1-mRNA-1	aAeg_AAEL000964-PA	mDom_gi|755871959|ref|XP_011292055.1	gMor_GMOY004404_PA
sBull_maker-Contig_1996-snap-gene-0.0-mRNA-1	lCup_FF38_02929	dMel_NP_609318.1	aGamb_XP_311434.3	mDest_maker-Un.22713-augustus-gene-1.49-mRNA-1	aAeg_AAEL013237-PA	mDom_gi|755881743|ref|XP_011293507.1	gMor_GMOY002288_PA
sBull_maker-Contig_7229-augustus-gene-0.5-mRNA-1	lCup_FF38_02983	dMel_NP_610796.1	aGamb_XP_316138.4	mDest_maker-X2.13-augustus-gene-16.81-mRNA-1	aAeg_AAEL014594-PA	mDom_gi|557755455|ref|XP_005177466.1	gMor_GMOY007172_PA
sBull_maker-Contig_154-snap-gene-3.45-mRNA-1	lCup_FF38_08791	dMel_NP_573251.1	aGamb_XP_311386.4	mDest_maker-A2.12-snap-gene-34.97-mRNA-1	aAeg_AAEL010762-PA	mDom_gi|557768713|ref|XP_005184033.1	gMor_GMOY004458_PA
sBull_maker-Contig_98-augustus-gene-4.27-mRNA-1	lCup_FF38_05918	dMel_NP_996031.1	aGamb_XP_315959.4	mDest_maker-X1Random.3-snap-gene-9.3-mRNA-1	aAeg_AAEL009601-PA	mDom_gi|557780972|ref|XP_005190107.1	gMor_GMOY003664_PA
sBull_snap_masked-Contig_235-processed-gene-0.12-mRNA-1	lCup_FF38_06530	dMel_NP_648769.2	aGamb_XP_316218.4	mDest_maker-A1.29-augustus-gene-12.77-mRNA-1	aAeg_AAEL002529-PA	mDom_gi|557769041|ref|XP_005184195.1	gMor_GMOY008090_PA
sBull_snap_masked-Contig_56-processed-gene-2.10-mRNA-1	lCup_FF38_10618	dMel_NP_001027215.1	aGamb_XP_310168.3	mDest_maker-A1.46-augustus-gene-22.41-mRNA-1	aAeg_AAEL006010-PA	mDom_gi|557766906|ref|XP_005183145.1	gMor_GMOY003293_PA
sBull_snap_masked-Contig_218-processed-gene-2.8-mRNA-1	lCup_FF38_12931	dMel_NP_649552.1	aGamb_XP_554108.3	mDest_augustus_masked-A1.3-abinit-gene-6.12-mRNA-1	aAeg_AAEL010642-PA	mDom_gi|557781899|ref|XP_005190566.1	gMor_GMOY009043_PA
sBull_maker-Contig_97-snap-gene-1.59-mRNA-1	lCup_FF38_08938	dMel_NP_523917.2	aGamb_XP_312101.5	mDest_maker-A2.14-augustus-gene-10.93-mRNA-1	aAeg_AAEL002119-PA	mDom_gi|557758336|ref|XP_005178896.1	gMor_GMOY003471_PA
sBull_maker-Contig_258-snap-gene-0.0-mRNA-1	lCup_FF38_07097	dMel_NP_523397.1	aGamb_XP_320424.4	mDest_maker-A2.9-augustus-gene-6.78-mRNA-1	aAeg_AAEL006856-PA	mDom_gi|557767278|ref|XP_005183329.1	gMor_GMOY000483_PA
sBull_maker-Contig_58-snap-gene-0.14-mRNA-1	lCup_FF38_05256	dMel_NP_647679.1	aGamb_XP_550898.4	mDest_maker-Un.17588-snap-gene-12.16-mRNA-1	aAeg_AAEL010066-PA	mDom_gi|557774044|ref|XP_005186672.1	gMor_GMOY006043_PA
sBull_maker-Contig_58-snap-gene-1.42-mRNA-1	lCup_FF38_05258	dMel_NP_647987.2	aGamb_XP_550868.4	mDest_augustus_masked-A2.11-abinit-gene-6.1-mRNA-1	aAeg_AAEL006140-PA	mDom_gi|557754055|ref|XP_005176772.1	gMor_GMOY007249_PA
sBull_maker-Contig_58-augustus-gene-1.23-mRNA-1	lCup_FF38_05262	dMel_NP_647837.2	aGamb_XP_315587.4	mDest_maker-X1Random.2-snap-gene-26.79-mRNA-1	aAeg_AAEL002752-PA	mDom_gi|557774062|ref|XP_005186681.1	gMor_GMOY000424_PA
sBull_snap_masked-Contig_58-processed-gene-1.2-mRNA-1	lCup_FF38_05261	dMel_NP_648167.1	aGamb_XP_318954.3	mDest_augustus_masked-Un.14080-abinit-gene-1.0-mRNA-1	aAeg_AAEL001154-PA	mDom_gi|557774046|ref|XP_005186673.1	gMor_GMOY002231_PA
sBull_maker-Contig_9-snap-gene-2.0-mRNA-1	lCup_FF38_09162	dMel_NP_525001.2	aGamb_XP_316598.2	mDest_augustus_masked-X1.7-abinit-gene-103.5-mRNA-1	aAeg_AAEL000378-PA	mDom_gi|557762168|ref|XP_005180798.1	gMor_GMOY000959_PA
sBull_maker-Contig_9-augustus-gene-4.63-mRNA-1	lCup_FF38_09144	dMel_NP_648210.1	aGamb_XP_309872.4	mDest_maker-Un.18557-snap-gene-6.13-mRNA-1	aAeg_AAEL005470-PA	mDom_gi|557765909|ref|XP_005182652.1	gMor_GMOY004934_PA
sBull_maker-Contig_450-augustus-gene-0.67-mRNA-1	lCup_FF38_04610	dMel_NP_650705.1	aGamb_XP_322015.3	mDest_maker-X1Random.38-augustus-gene-1.93-mRNA-1	aAeg_AAEL004364-PA	mDom_gi|557767949|ref|XP_005183660.1	gMor_GMOY004637_PA
sBull_augustus_masked-Contig_10244-processed-gene-0.1-mRNA-1	lCup_FF38_06008	dMel_NP_523369.2	aGamb_XP_320116.6	mDest_maker-X1Random.2-augustus-gene-16.94-mRNA-1	aAeg_AAEL010069-PA	mDom_gi|755866765|ref|XP_011291300.1	gMor_GMOY007137_PA
sBull_augustus_masked-Contig_13590-processed-gene-0.1-mRNA-1	lCup_FF38_05376	dMel_NP_001033842.1	aGamb_XP_312091.5	mDest_maker-A1.44-snap-gene-2.3-mRNA-1	aAeg_AAEL010891-PA	mDom_gi|557766267|ref|XP_005182829.1	gMor_GMOY007235_PA
sBull_maker-Contig_4606-augustus-gene-0.8-mRNA-1	lCup_FF38_09284	dMel_NP_649099.1	aGamb_XP_316857.3	mDest_augustus_masked-A1.46-abinit-gene-8.10-mRNA-1	aAeg_AAEL011756-PA	mDom_gi|557771938|ref|XP_005185627.1	gMor_GMOY012131_PA
sBull_snap_masked-Contig_66-processed-gene-4.37-mRNA-1	lCup_FF38_10130	dMel_NP_650441.1	aGamb_XP_317021.4	mDest_snap_masked-X2.5-abinit-gene-1.33-mRNA-1	aAeg_AAEL010333-PA	mDom_gi|557762755|ref|XP_005181091.1	gMor_GMOY006655_PA
sBull_maker-Contig_66-snap-gene-4.6-mRNA-1	lCup_FF38_10122	dMel_NP_650428.1	aGamb_XP_321782.4	mDest_maker-A2.7-augustus-gene-6.63-mRNA-1	aAeg_AAEL011819-PA	mDom_gi|557785331|ref|XP_005192266.1	gMor_GMOY005129_PA
sBull_maker-Contig_186-augustus-gene-2.83-mRNA-1	lCup_FF38_07184	dMel_NP_523588.2	aGamb_XP_311424.1	mDest_snap_masked-X2.4-abinit-gene-6.57-mRNA-1	aAeg_AAEL008741-PA	mDom_gi|557751237|ref|XP_005175375.1	gMor_GMOY010038_PA
sBull_maker-Contig_17382-augustus-gene-0.3-mRNA-1	lCup_FF38_12226	dMel_NP_610477.2	aGamb_XP_316663.4	mDest_maker-A2.1-augustus-gene-5.65-mRNA-1	aAeg_AAEL018276-PA	mDom_gi|557758606|ref|XP_005179030.1	gMor_GMOY011369_PA
sBull_maker-Contig_18-snap-gene-2.28-mRNA-1	lCup_FF38_11978	dMel_NP_649059.1	aGamb_XP_309926.3	mDest_maker-Un.7037-snap-gene-2.2-mRNA-1	aAeg_AAEL000955-PA	mDom_gi|557778641|ref|XP_005188949.1	gMor_GMOY005990_PA
sBull_maker-Contig_183-snap-gene-1.29-mRNA-1	lCup_FF38_11437	dMel_NP_650128.1	aGamb_XP_318486.5	mDest_maker-X1.7-augustus-gene-78.35-mRNA-1	aAeg_AAEL013737-PA	mDom_gi|557770696|ref|XP_005185011.1	gMor_GMOY003835_PA
sBull_maker-Contig_238-snap-gene-1.80-mRNA-1	lCup_FF38_12408	dMel_NP_649519.1	aGamb_XP_313296.4	mDest_maker-A2.9-augustus-gene-5.66-mRNA-1	aAeg_AAEL000440-PA	mDom_gi|557775869|ref|XP_005187579.1	gMor_GMOY006238_PA
sBull_maker-Contig_101-snap-gene-3.2-mRNA-1	lCup_FF38_01188	dMel_NP_649862.1	aGamb_XP_313287.4	mDest_snap_masked-A2.12-abinit-gene-26.29-mRNA-1	aAeg_AAEL000411-PA	mDom_gi|557780410|ref|XP_005189827.1	gMor_GMOY009048_PA
sBull_maker-Contig_101-snap-gene-3.4-mRNA-1	lCup_FF38_13106	dMel_NP_650941.3	aGamb_XP_313822.4	mDest_maker-X1Random.8-augustus-gene-22.75-mRNA-1	aAeg_AAEL011326-PA	mDom_gi|755878856|ref|XP_011293074.1	gMor_GMOY009991_PA
sBull_maker-Contig_101-snap-gene-4.9-mRNA-1	lCup_FF38_13102	dMel_NP_650942.1	aGamb_XP_316678.1	mDest_augustus_masked-X1.7-abinit-gene-32.2-mRNA-1	aAeg_AAEL003736-PA	mDom_gi|557770404|ref|XP_005184870.1	gMor_GMOY009990_PA
sBull_maker-Contig_14013-augustus-gene-0.3-mRNA-1	lCup_FF38_13425	dMel_NP_476726.2	aGamb_XP_309496.4	mDest_maker-X2.15-snap-gene-1.14-mRNA-1	aAeg_AAEL004431-PA	mDom_gi|557769720|ref|XP_005184533.1	gMor_GMOY000352_PA
sBull_maker-Contig_436-augustus-gene-0.36-mRNA-1	lCup_FF38_12712	dMel_NP_650897.3	aGamb_XP_321192.5	mDest_maker-Un.2397-augustus-gene-0.3-mRNA-1	aAeg_AAEL003368-PA	mDom_gi|557756966|ref|XP_005178217.1	gMor_GMOY012180_PA
sBull_maker-Contig_37477-augustus-gene-0.3-mRNA-1	lCup_FF38_12067	dMel_NP_610599.3	aGamb_XP_308871.4	mDest_maker-X2.3-augustus-gene-14.71-mRNA-1	aAeg_AAEL009958-PA	mDom_gi|557777534|ref|XP_005188401.1	gMor_GMOY000533_PA
sBull_maker-Contig_68-snap-gene-1.14-mRNA-1	lCup_FF38_09841	dMel_NP_001286840.1	aGamb_XP_309785.4	mDest_maker-X2.8-snap-gene-4.37-mRNA-1	aAeg_AAEL000899-PA	mDom_gi|557756530|ref|XP_005178001.1	gMor_GMOY004973_PA
sBull_maker-Contig_408-augustus-gene-0.39-mRNA-1	lCup_FF38_11374	dMel_NP_572390.1	aGamb_XP_309756.4	mDest_maker-A2.9-snap-gene-13.184-mRNA-1	aAeg_AAEL002286-PA	mDom_gi|557773923|ref|XP_005186612.1	gMor_GMOY003449_PA
sBull_maker-Contig_79-snap-gene-4.8-mRNA-1	lCup_FF38_09579	dMel_NP_647633.1	aGamb_XP_312519.3	mDest_maker-Un.1210-snap-gene-0.4-mRNA-1	aAeg_AAEL010953-PA	mDom_gi|557778900|ref|XP_005189077.1	gMor_GMOY007296_PA
sBull_augustus_masked-Contig_246-processed-gene-0.23-mRNA-1	lCup_FF38_12542	dMel_NP_649646.3	aGamb_XP_311210.4	mDest_maker-X1.7-snap-gene-53.44-mRNA-1	aAeg_AAEL011199-PA	mDom_gi|557765085|ref|XP_005182246.1	gMor_GMOY004625_PA
sBull_maker-Contig_261-snap-gene-0.13-mRNA-1	lCup_FF38_08316	dMel_NP_609837.1	aGamb_XP_310183.4	mDest_maker-Un.16534-augustus-gene-2.108-mRNA-1	aAeg_AAEL007701-PA	mDom_gi|557766657|ref|XP_005183023.1	gMor_GMOY004480_PB
sBull_maker-Contig_261-snap-gene-1.55-mRNA-1	lCup_FF38_08315	dMel_NP_609836.1	aGamb_XP_319985.2	mDest_maker-A2.5-augustus-gene-4.1-mRNA-1	aAeg_AAEL013700-PA	mDom_gi|557766655|ref|XP_005183022.1	gMor_GMOY004482_PA
sBull_maker-Contig_6829-snap-gene-0.5-mRNA-1	lCup_FF38_10681	dMel_NP_722456.1	aGamb_XP_315939.2	mDest_maker-A1.46-augustus-gene-24.78-mRNA-1	aAeg_AAEL010861-PA	mDom_gi|557779416|ref|XP_005189335.1	gMor_GMOY005686_PA
sBull_augustus_masked-Contig_15675-processed-gene-0.2-mRNA-1	lCup_FF38_05389	dMel_NP_477222.1	aGamb_XP_318287.4	mDest_maker-Un.17014-snap-gene-0.8-mRNA-1	aAeg_AAEL008461-PA	mDom_gi|557775438|ref|XP_005187365.1	gMor_GMOY000583_PA
sBull_maker-Contig_369-snap-gene-0.2-mRNA-1	lCup_FF38_00805	dMel_NP_648439.1	aGamb_XP_315043.4	mDest_augustus_masked-X1.7-abinit-gene-96.2-mRNA-1	aAeg_AAEL001250-PA	mDom_gi|557767201|ref|XP_005183291.1	gMor_GMOY004287_PA
sBull_maker-Contig_91-augustus-gene-2.11-mRNA-1	lCup_FF38_04715	dMel_NP_647789.2	aGamb_XP_315477.2	mDest_snap_masked-X1.7-abinit-gene-2.19-mRNA-1	aAeg_AAEL013561-PA	mDom_gi|557774748|ref|XP_005187021.1	gMor_GMOY007284_PA
sBull_maker-Contig_2022-snap-gene-0.10-mRNA-1	lCup_FF38_05856	dMel_NP_610165.1	aGamb_XP_316233.3	mDest_maker-X2.8-snap-gene-7.98-mRNA-1	aAeg_AAEL017339-PA	mDom_gi|557775899|ref|XP_005187594.1	gMor_GMOY004100_PA
sBull_maker-Contig_134-snap-gene-3.14-mRNA-1	lCup_FF38_09703	dMel_NP_652614.1	aGamb_XP_563754.3	mDest_maker-A2.14-augustus-gene-5.48-mRNA-1	aAeg_AAEL004033-PA	mDom_gi|557758118|ref|XP_005178788.1	gMor_GMOY009747_PA
sBull_snap_masked-Contig_124-processed-gene-3.5-mRNA-1	lCup_FF38_04490	dMel_NP_649512.1	aGamb_XP_318802.4	mDest_maker-Un.16573-augustus-gene-0.6-mRNA-1	aAeg_AAEL000605-PA	mDom_gi|557782171|ref|XP_005190700.1	gMor_GMOY010049_PA
sBull_augustus_masked-Contig_140-processed-gene-1.37-mRNA-1	lCup_FF38_10725	dMel_NP_569873.1	aGamb_XP_319580.4	mDest_maker-Un.7823-augustus-gene-0.7-mRNA-1	aAeg_AAEL011993-PC	mDom_gi|557785305|ref|XP_005192253.1	gMor_GMOY001072_PA
sBull_maker-Contig_191-augustus-gene-1.14-mRNA-1	lCup_FF38_01816	dMel_NP_573099.1	aGamb_XP_311882.5	mDest_snap_masked-X2.17-abinit-gene-5.64-mRNA-1	aAeg_AAEL001037-PA	mDom_gi|557776683|ref|XP_005187980.1	gMor_GMOY010147_PA
sBull_maker-Contig_191-snap-gene-1.29-mRNA-1	lCup_FF38_01817	dMel_NP_511166.2	aGamb_XP_316827.4	mDest_maker-X1.1-augustus-gene-36.68-mRNA-1	aAeg_AAEL013116-PA	mDom_gi|557776691|ref|XP_005187984.1	gMor_GMOY011632_PA
sBull_maker-Contig_184-snap-gene-0.9-mRNA-1	lCup_FF38_00901	dMel_NP_609847.1	aGamb_XP_320011.4	mDest_maker-A1.28-snap-gene-17.37-mRNA-2	aAeg_AAEL000331-PA	mDom_gi|557760032|ref|XP_005179740.1	gMor_GMOY007919_PA
sBull_maker-Contig_184-snap-gene-1.36-mRNA-1	lCup_FF38_07630	dMel_NP_609449.1	aGamb_XP_319357.4	mDest_maker-Un.17588-augustus-gene-11.57-mRNA-1	aAeg_AAEL003157-PA	mDom_gi|557756080|ref|XP_005177778.1	gMor_GMOY004758_PA
sBull_maker-Contig_184-augustus-gene-1.62-mRNA-1	lCup_FF38_03940	dMel_NP_523473.2	aGamb_XP_320639.4	mDest_maker-A2.1-augustus-gene-3.70-mRNA-1	aAeg_AAEL008582-PA	mDom_gi|557766003|ref|XP_005182699.1	gMor_GMOY004803_PA
sBull_maker-Contig_69-snap-gene-2.32-mRNA-1	lCup_FF38_00130	dMel_NP_648245.2	aGamb_XP_315752.4	mDest_maker-X2.13-snap-gene-12.82-mRNA-1	aAeg_AAEL003059-PA	mDom_gi|557755517|ref|XP_005177497.1	gMor_GMOY007214_PA
sBull_maker-Contig_69-augustus-gene-5.11-mRNA-1	lCup_FF38_07753	dMel_NP_648230.1	aGamb_XP_001688720.1	mDest_maker-Un.18557-augustus-gene-1.29-mRNA-1	aAeg_AAEL003065-PA	mDom_gi|557771996|ref|XP_005185656.1	gMor_GMOY004665_PA
sBull_maker-Contig_999-augustus-gene-0.11-mRNA-1	lCup_FF38_14525	dMel_NP_728821.2	aGamb_XP_316184.4	mDest_maker-Un.2967-snap-gene-2.33-mRNA-1	aAeg_AAEL009603-PA	mDom_gi|755898959|ref|XP_011295522.1	gMor_GMOY001194_PA
sBull_maker-Contig_7873-snap-gene-0.0-mRNA-1	lCup_FF38_09975	dMel_NP_523829.2	aGamb_XP_565033.3	mDest_augustus_masked-Un.1540-abinit-gene-1.11-mRNA-1	aAeg_AAEL002483-PA	mDom_gi|557768177|ref|XP_005183773.1	gMor_GMOY006701_PA
sBull_maker-Contig_5-snap-gene-12.0-mRNA-1	lCup_FF38_00653	dMel_NP_611503.1	aGamb_XP_308445.4	mDest_augustus_masked-X1Random.2-abinit-gene-4.12-mRNA-1	aAeg_AAEL010107-PA	mDom_gi|557750106|ref|XP_005174817.1	gMor_GMOY000105_PA
sBull_maker-Contig_176-snap-gene-2.21-mRNA-1	lCup_FF38_10154	dMel_NP_609111.1	aGamb_XP_317249.2	mDest_maker-Un.23812-snap-gene-1.64-mRNA-1	aAeg_AAEL010682-PA	mDom_gi|557761011|ref|XP_005180225.1	gMor_GMOY005752_PA
sBull_maker-Contig_176-augustus-gene-2.1-mRNA-1	lCup_FF38_10153	dMel_NP_648171.1	aGamb_XP_314736.4	mDest_augustus_masked-Un.23812-abinit-gene-1.3-mRNA-1	aAeg_AAEL012378-PA	mDom_gi|557760997|ref|XP_005180218.1	gMor_GMOY005754_PA
sBull_maker-Contig_727-snap-gene-0.0-mRNA-1	lCup_FF38_09301	dMel_NP_001036603.1	aGamb_XP_315378.2	mDest_augustus_masked-X1Random.8-abinit-gene-7.3-mRNA-1	aAeg_AAEL013120-PA	mDom_gi|755905586|ref|XP_005192070.2	gMor_GMOY011225_PA
sBull_augustus_masked-Contig_599-processed-gene-0.22-mRNA-1	lCup_FF38_13372	dMel_NP_569916.1	aGamb_XP_311293.5	mDest_maker-X1.3-augustus-gene-0.43-mRNA-1	aAeg_AAEL004163-PA	mDom_gi|557751696|ref|XP_005175602.1	gMor_GMOY011759_PA
sBull_maker-Contig_1-snap-gene-7.24-mRNA-1	lCup_FF38_08669	dMel_NP_523814.1	aGamb_XP_317309.4	mDest_maker-X2.15-augustus-gene-0.31-mRNA-1	aAeg_AAEL014284-PA	mDom_gi|755856217|ref|XP_011296386.1	gMor_GMOY010857_PA
sBull_maker-Contig_1-snap-gene-9.20-mRNA-1	lCup_FF38_10965	dMel_NP_610938.1	aGamb_XP_309530.2	mDest_snap_masked-X2.3-abinit-gene-18.36-mRNA-1	aAeg_AAEL000780-PA	mDom_gi|557767259|ref|XP_005183320.1	gMor_GMOY010843_PA
sBull_maker-Contig_1-snap-gene-11.10-mRNA-1	lCup_FF38_03824	dMel_NP_523657.1	aGamb_XP_564803.3	mDest_maker-A2.12-augustus-gene-0.45-mRNA-1	aAeg_AAEL001428-PA	mDom_gi|557764599|ref|XP_005182006.1	gMor_GMOY003951_PA
sBull_maker-Contig_832-augustus-gene-0.19-mRNA-1	lCup_FF38_11304	dMel_NP_611241.2	aGamb_XP_317851.1	mDest_maker-Un.1210-snap-gene-1.13-mRNA-1	aAeg_AAEL003473-PA	mDom_gi|755882995|ref|XP_011293689.1	gMor_GMOY006903_PA
sBull_maker-Contig_21672-augustus-gene-0.1-mRNA-1	lCup_FF38_00192	dMel_NP_572434.1	aGamb_XP_310780.5	mDest_augustus_masked-A1.46-abinit-gene-5.8-mRNA-1	aAeg_AAEL010598-PA	mDom_gi|557755738|ref|XP_005177607.1	gMor_GMOY008273_PA
sBull_maker-Contig_20520-augustus-gene-0.1-mRNA-1	lCup_FF38_02919	dMel_NP_609079.2	aGamb_XP_319753.4	mDest_maker-A1.4-augustus-gene-1.19-mRNA-1	aAeg_AAEL001238-PA	mDom_gi|557776167|ref|XP_005187727.1	gMor_GMOY008843_PA
sBull_maker-Contig_4167-snap-gene-0.4-mRNA-1	lCup_FF38_12067	dMel_NP_610599.3	aGamb_XP_308871.4	mDest_maker-X2.3-augustus-gene-14.71-mRNA-1	aAeg_AAEL009958-PA	mDom_gi|557777534|ref|XP_005188401.1	gMor_GMOY000533_PA
sBull_maker-Contig_758-snap-gene-0.7-mRNA-1	lCup_FF38_08633	dMel_NP_572952.1	aGamb_XP_314026.4	mDest_maker-X1Random.2-augustus-gene-28.70-mRNA-1	aAeg_AAEL011759-PA	mDom_gi|557765264|ref|XP_005182334.1	gMor_GMOY007225_PA
sBull_maker-Contig_143-snap-gene-1.31-mRNA-1	lCup_FF38_12487	dMel_NP_609148.1	aGamb_XP_553263.2	mDest_snap_masked-A1.20-abinit-gene-2.53-mRNA-1	aAeg_AAEL002215-PA	mDom_gi|557752975|ref|XP_005176233.1	gMor_GMOY011011_PA
sBull_snap_masked-Contig_143-processed-gene-2.48-mRNA-1	lCup_FF38_12491	dMel_NP_611425.1	aGamb_XP_311025.2	mDest_maker-A2.5-augustus-gene-6.56-mRNA-1	aAeg_AAEL002135-PA	mDom_gi|557753023|ref|XP_005176257.1	gMor_GMOY010719_PA
sBull_maker-Contig_143-augustus-gene-3.79-mRNA-1	lCup_FF38_10486	dMel_NP_608635.1	aGamb_XP_319149.2	mDest_maker-A1.46-augustus-gene-18.71-mRNA-1	aAeg_AAEL002386-PA	mDom_gi|557752294|ref|XP_005175897.1	gMor_GMOY005311_PA
sBull_maker-Contig_790-augustus-gene-0.24-mRNA-1	lCup_FF38_00217	dMel_NP_650431.1	aGamb_XP_307942.5	mDest_augustus_masked-A2.12-abinit-gene-28.10-mRNA-1	aAeg_AAEL010796-PA	mDom_gi|557775711|ref|XP_005187500.1	gMor_GMOY003911_PA
sBull_maker-Contig_8069-snap-gene-0.7-mRNA-1	lCup_FF38_02982	dMel_NP_611306.1	aGamb_XP_316648.3	mDest_maker-X1.7-snap-gene-64.23-mRNA-1	aAeg_AAEL012273-PA	mDom_gi|557781837|ref|XP_005190536.1	gMor_GMOY001758_PA
sBull_maker-Contig_139-snap-gene-3.76-mRNA-1	lCup_FF38_05716	dMel_NP_648781.1	aGamb_XP_313396.5	mDest_maker-X1.1-augustus-gene-35.26-mRNA-1	aAeg_AAEL008706-PA	mDom_gi|557761568|ref|XP_005180502.1	gMor_GMOY002679_PA
sBull_snap_masked-Contig_3769-processed-gene-0.1-mRNA-1	lCup_FF38_09933	dMel_NP_649649.1	aGamb_XP_319205.3	mDest_maker-Un.17588-augustus-gene-12.65-mRNA-1	aAeg_AAEL004920-PA	mDom_gi|557767537|ref|XP_005183457.1	gMor_GMOY008173_PA
sBull_maker-Contig_197-snap-gene-0.4-mRNA-1	lCup_FF38_04957	dMel_NP_649451.1	aGamb_XP_309652.2	mDest_maker-X1Random.2-augustus-gene-8.85-mRNA-1	aAeg_AAEL007509-PA	mDom_gi|557771732|ref|XP_005185525.1	gMor_GMOY002540_PA
sBull_maker-Contig_197-snap-gene-1.1-mRNA-1	lCup_FF38_04954	dMel_NP_524363.3	aGamb_XP_309139.5	mDest_augustus_masked-X1Random.8-abinit-gene-21.6-mRNA-1	aAeg_AAEL011390-PA	mDom_gi|557771728|ref|XP_005185523.1	gMor_GMOY002536_PA
sBull_maker-Contig_197-snap-gene-1.11-mRNA-1	lCup_FF38_04311	dMel_NP_649937.1	aGamb_XP_313036.4	mDest_snap_masked-X1Random.8-abinit-gene-16.86-mRNA-1	aAeg_AAEL005047-PA	mDom_gi|755872226|ref|XP_005182548.2	gMor_GMOY002529_PA
sBull_maker-Contig_464-augustus-gene-0.2-mRNA-1	lCup_FF38_11009	dMel_NP_572919.1	aGamb_XP_314471.2	mDest_maker-Un.19865-augustus-gene-5.102-mRNA-1	aAeg_AAEL001080-PA	mDom_gi|557769028|ref|XP_005184189.1	gMor_GMOY001660_PA
sBull_maker-Contig_464-augustus-gene-0.6-mRNA-1	lCup_FF38_11004	dMel_NP_648767.1	aGamb_XP_318219.2	mDest_augustus_masked-Un.22926-abinit-gene-0.0-mRNA-1	aAeg_AAEL014704-PA	mDom_gi|557769033|ref|XP_005184191.1	gMor_GMOY008089_PA
sBull_maker-Contig_2364-snap-gene-0.16-mRNA-1	lCup_FF38_06495	dMel_NP_477286.2	aGamb_XP_560205.4	mDest_maker-Un.16662-snap-gene-0.96-mRNA-1	aAeg_AAEL004237-PA	mDom_gi|557773161|ref|XP_005186234.1	gMor_GMOY003458_PA
sBull_maker-Contig_230-snap-gene-1.53-mRNA-1	lCup_FF38_06824	dMel_NP_608841.1	aGamb_XP_313776.4	mDest_augustus_masked-A2.3-abinit-gene-4.12-mRNA-1	aAeg_AAEL008807-PA	mDom_gi|557770241|ref|XP_005184789.1	gMor_GMOY010013_PA
sBull_snap_masked-Contig_230-processed-gene-2.17-mRNA-1	lCup_FF38_06821	dMel_NP_608612.3	aGamb_XP_317548.3	mDest_maker-X2.3-snap-gene-3.6-mRNA-1	aAeg_AAEL002694-PA	mDom_gi|557770249|ref|XP_005184793.1	gMor_GMOY001655_PA
sBull_maker-Contig_856-augustus-gene-0.19-mRNA-1	lCup_FF38_05034	dMel_NP_572475.1	aGamb_XP_314651.3	mDest_augustus_masked-A1.29-abinit-gene-12.11-mRNA-1	aAeg_AAEL011353-PA	mDom_gi|557763094|ref|XP_005181260.1	gMor_GMOY010698_PA
sBull_maker-Contig_254-snap-gene-1.62-mRNA-1	lCup_FF38_13753	dMel_NP_609246.1	aGamb_XP_320754.1	mDest_augustus_masked-X2.4-abinit-gene-6.7-mRNA-1	aAeg_AAEL003437-PA	mDom_gi|557770530|ref|XP_005184930.1	gMor_GMOY011354_PA
sBull_augustus_masked-Contig_254-processed-gene-1.9-mRNA-1	lCup_FF38_05152	dMel_NP_477240.1	aGamb_XP_317574.3	mDest_maker-Un.23812-augustus-gene-1.1-mRNA-1	aAeg_AAEL000708-PA	mDom_gi|557770542|ref|XP_005184936.1	gMor_GMOY011269_PA
sBull_maker-Contig_1401-snap-gene-0.6-mRNA-1	lCup_FF38_01023	dMel_NP_730167.2	aGamb_XP_320190.4	mDest_maker-X1.7-augustus-gene-102.42-mRNA-1	aAeg_AAEL012498-PA	mDom_gi|557751935|ref|XP_005175720.1	gMor_GMOY003709_PA
sBull_maker-Contig_32842-augustus-gene-0.0-mRNA-1	lCup_FF38_01690	dMel_NP_523759.1	aGamb_XP_309480.3	mDest_maker-Un.16074-augustus-gene-0.3-mRNA-1	aAeg_AAEL012949-PA	mDom_gi|557771413|ref|XP_005185368.1	gMor_GMOY010673_PA
sBull_maker-Contig_27821-snap-gene-0.5-mRNA-1	lCup_FF38_03229	dMel_NP_477133.1	aGamb_XP_319464.4	mDest_maker-A2.14-augustus-gene-4.38-mRNA-1	aAeg_AAEL018186-PA	mDom_gi|557759142|ref|XP_005179296.1	gMor_GMOY005254_PA
sBull_maker-Contig_320-augustus-gene-1.1-mRNA-1	lCup_FF38_08521	dMel_NP_651365.1	aGamb_XP_321599.4	mDest_maker-Un.19322-augustus-gene-4.84-mRNA-1	aAeg_AAEL011114-PA	mDom_gi|557768755|ref|XP_005184054.1	gMor_GMOY008548_PA
sBull_maker-Contig_26398-snap-gene-0.4-mRNA-1	lCup_FF38_08591	dMel_NP_572480.1	aGamb_XP_321797.4	mDest_augustus_masked-A2.12-abinit-gene-34.0-mRNA-1	aAeg_AAEL008788-PA	mDom_gi|557771533|ref|XP_005185427.1	gMor_GMOY004470_PA
sBull_maker-Contig_19037-snap-gene-0.4-mRNA-1	lCup_FF38_06291	dMel_NP_652040.2	aGamb_XP_310703.4	mDest_augustus_masked-A1.36-abinit-gene-4.22-mRNA-1	aAeg_AAEL014051-PA	mDom_gi|557752356|ref|XP_005175928.1	gMor_GMOY002635_PA
sBull_maker-Contig_433-snap-gene-0.0-mRNA-1	lCup_FF38_06828	dMel_NP_610554.1	aGamb_XP_308224.3	mDest_augustus_masked-Un.21950-abinit-gene-4.10-mRNA-1	aAeg_AAEL006887-PA	mDom_gi|557768115|ref|XP_005183742.1	gMor_GMOY006169_PA
sBull_maker-Contig_10-snap-gene-11.228-mRNA-1	lCup_FF38_09235	dMel_NP_652007.1	aGamb_XP_563662.3	mDest_maker-Un.13183-snap-gene-0.0-mRNA-1	aAeg_AAEL013968-PA	mDom_gi|557760531|ref|XP_005179986.1	gMor_GMOY010148_PA
sBull_maker-Contig_10-snap-gene-11.264-mRNA-1	lCup_FF38_06464	dMel_NP_569906.1	aGamb_XP_553285.4	mDest_maker-A2Random.62-augustus-gene-13.1-mRNA-1	aAeg_AAEL000978-PA	mDom_gi|557751181|ref|XP_005175348.1	gMor_GMOY002550_PB
sBull_maker-Contig_14415-snap-gene-0.5-mRNA-1	lCup_FF38_02651	dMel_NP_610431.1	aGamb_XP_318853.2	mDest_maker-Un.22582-augustus-gene-0.46-mRNA-1	aAeg_AAEL010689-PA	mDom_gi|557765453|ref|XP_005182427.1	gMor_GMOY000098_PA
sBull_maker-Contig_4135-snap-gene-0.5-mRNA-1	lCup_FF38_03158	dMel_NP_476797.1	aGamb_XP_307878.4	mDest_augustus_masked-Un.12539-abinit-gene-0.4-mRNA-1	aAeg_AAEL008621-PA	mDom_gi|755850449|ref|XP_011290891.1	gMor_GMOY010352_PA
sBull_maker-Contig_1046-augustus-gene-0.9-mRNA-1	lCup_FF38_09588	dMel_NP_609378.1	aGamb_XP_312390.4	mDest_maker-A2.12-augustus-gene-2.95-mRNA-1	aAeg_AAEL006155-PA	mDom_gi|557769524|ref|XP_005184435.1	gMor_GMOY002429_PA
sBull_maker-Contig_210-snap-gene-2.38-mRNA-1	lCup_FF38_07583	dMel_NP_523544.2	aGamb_XP_318638.4	mDest_maker-Un.3480-augustus-gene-0.3-mRNA-1	aAeg_AAEL013637-PA	mDom_gi|557766452|ref|XP_005182921.1	gMor_GMOY006073_PA
sBull_maker-Contig_227-snap-gene-2.20-mRNA-1	lCup_FF38_13266	dMel_NP_001137883.1	aGamb_XP_321150.4	mDest_maker-A2.1-snap-gene-9.12-mRNA-1	aAeg_AAEL010058-PA	mDom_gi|558515885|ref|NP_001273828.1	gMor_GMOY008001_PA
sBull_maker-Contig_253-snap-gene-1.15-mRNA-1	lCup_FF38_04635	dMel_NP_649916.1	aGamb_XP_312173.2	mDest_maker-X2.3-augustus-gene-14.71-mRNA-1	aAeg_AAEL000807-PA	mDom_gi|557783795|ref|XP_005191504.1	gMor_GMOY009982_PA
sBull_maker-Contig_253-snap-gene-1.18-mRNA-1	lCup_FF38_04630	dMel_NP_649850.1	aGamb_XP_311898.4	mDest_maker-A2Random.62-snap-gene-1.22-mRNA-1	aAeg_AAEL001188-PA	mDom_gi|557783781|ref|XP_005191497.1	gMor_GMOY010828_PA
sBull_maker-Contig_71-augustus-gene-0.17-mRNA-1	lCup_FF38_01314	dMel_NP_650751.3	aGamb_XP_312262.4	mDest_maker-X1Random.8-snap-gene-33.10-mRNA-1	aAeg_AAEL014947-PA	mDom_gi|557772999|ref|XP_005186153.1	gMor_GMOY011535_PA
sBull_maker-Contig_4589-snap-gene-0.10-mRNA-1	lCup_FF38_02202	dMel_NP_651709.1	aGamb_XP_311720.5	mDest_maker-A1.33-augustus-gene-9.31-mRNA-1	aAeg_AAEL004634-PA	mDom_gi|557754517|ref|XP_005177002.1	gMor_GMOY007127_PA
sBull_maker-Contig_151-snap-gene-2.4-mRNA-1	lCup_FF38_04565	dMel_NP_524485.1	aGamb_XP_309489.4	mDest_augustus_masked-A1.23-abinit-gene-4.4-mRNA-1	aAeg_AAEL004426-PA	mDom_gi|557766184|ref|XP_005182788.1	gMor_GMOY011340_PA
sBull_maker-Contig_172-snap-gene-2.45-mRNA-1	lCup_FF38_07204	dMel_NP_649710.1	aGamb_XP_314636.3	mDest_maker-A2.12-snap-gene-19.114-mRNA-1	aAeg_AAEL011827-PA	mDom_gi|557769421|ref|XP_005184384.1	gMor_GMOY002140_PA
sBull_maker-Contig_1238-snap-gene-0.8-mRNA-1	lCup_FF38_07892	dMel_NP_001015316.1	aGamb_XP_321391.4	mDest_maker-X1.7-augustus-gene-30.54-mRNA-1	aAeg_AAEL006187-PA	mDom_gi|557781588|ref|XP_005190412.1	gMor_GMOY011513_PA
sBull_maker-Contig_225-snap-gene-2.18-mRNA-1	lCup_FF38_09002	dMel_NP_731339.1	aGamb_XP_308075.2	mDest_maker-X1Random.2-snap-gene-28.79-mRNA-1	aAeg_AAEL010326-PA	mDom_gi|557760849|ref|XP_005180144.1	gMor_GMOY002024_PA
sBull_maker-Contig_14-snap-gene-10.57-mRNA-1	lCup_FF38_00573	dMel_NP_650493.2	aGamb_XP_321561.5	mDest_maker-Un.20964-snap-gene-5.53-mRNA-1	aAeg_AAEL000508-PA	mDom_gi|557757904|ref|XP_005178682.1	gMor_GMOY001676_PA
sBull_maker-Contig_347-augustus-gene-1.5-mRNA-1	lCup_FF38_01905	dMel_NP_651829.1	aGamb_XP_316784.4	mDest_maker-X1Random.1-augustus-gene-16.65-mRNA-1	aAeg_AAEL003049-PA	mDom_gi|557762540|ref|XP_005180984.1	gMor_GMOY007683_PA
sBull_snap_masked-Contig_4511-processed-gene-0.3-mRNA-1	lCup_FF38_14482	dMel_NP_648486.1	aGamb_XP_316945.3	mDest_augustus_masked-Un.16507-abinit-gene-0.0-mRNA-1	aAeg_AAEL000241-PA	mDom_gi|557762839|ref|XP_005181133.1	gMor_GMOY007327_PA
sBull_maker-Contig_431-snap-gene-0.58-mRNA-1	lCup_FF38_02717	dMel_NP_609790.1	aGamb_XP_320310.3	mDest_augustus_masked-A1.46-abinit-gene-0.3-mRNA-1	aAeg_AAEL014038-PA	mDom_gi|755887175|ref|XP_005187889.2	gMor_GMOY008592_PA
sBull_snap_masked-Contig_431-processed-gene-0.21-mRNA-1	lCup_FF38_02722	dMel_NP_573063.1	aGamb_XP_001687843.2	mDest_maker-A2.9-augustus-gene-14.54-mRNA-1	aAeg_AAEL011155-PA	mDom_gi|557776506|ref|XP_005187893.1	gMor_GMOY002253_PA
sBull_maker-Contig_95-snap-gene-3.43-mRNA-1	lCup_FF38_01546	dMel_NP_569978.1	aGamb_XP_318065.4	mDest_augustus_masked-A1.33-abinit-gene-7.6-mRNA-1	aAeg_AAEL009156-PA	mDom_gi|557782435|ref|XP_005190830.1	gMor_GMOY002210_PA
sBull_maker-Contig_95-snap-gene-3.48-mRNA-1	lCup_FF38_01543	dMel_NP_569954.1	aGamb_XP_310613.2	mDest_maker-A2.1-augustus-gene-5.59-mRNA-1	aAeg_AAEL014037-PA	mDom_gi|755899082|ref|XP_005190829.2	gMor_GMOY002209_PA
sBull_maker-Contig_17608-augustus-gene-0.1-mRNA-1	lCup_FF38_00637	dMel_NP_647865.2	aGamb_XP_312095.5	mDest_snap_masked-A2.7-abinit-gene-9.46-mRNA-1	aAeg_AAEL002102-PA	mDom_gi|557772208|ref|XP_005185762.1	gMor_GMOY003070_PA
sBull_maker-Contig_219-snap-gene-1.67-mRNA-1	lCup_FF38_09622	dMel_NP_524366.1	aGamb_XP_310386.6	mDest_maker-A2Random.1-snap-gene-0.1-mRNA-1	aAeg_AAEL000088-PA	mDom_gi|755868185|ref|XP_005181173.2	gMor_GMOY011987_PA
sBull_snap_masked-Contig_14100-processed-gene-0.3-mRNA-1	lCup_FF38_12216	dMel_NP_611207.1	aGamb_XP_314113.4	mDest_augustus_masked-X2.17-abinit-gene-13.9-mRNA-1	aAeg_AAEL011435-PA	mDom_gi|557752531|ref|XP_005176014.1	gMor_GMOY008305_PA
sBull_maker-Contig_291-augustus-gene-1.12-mRNA-1	lCup_FF38_09410	dMel_NP_608544.1	aGamb_XP_306103.4	mDest_maker-Un.16534-augustus-gene-3.80-mRNA-1	aAeg_AAEL004456-PA	mDom_gi|557782491|ref|XP_005190858.1	gMor_GMOY010586_PA
sBull_maker-Contig_291-augustus-gene-1.14-mRNA-1	lCup_FF38_09409	dMel_NP_608550.1	aGamb_XP_308369.3	mDest_maker-A1.15-augustus-gene-10.46-mRNA-1	aAeg_AAEL009303-PA	mDom_gi|755872873|ref|XP_005182774.2	gMor_GMOY004891_PB
sBull_maker-Contig_188-snap-gene-0.22-mRNA-1	lCup_FF38_05050	dMel_NP_650976.1	aGamb_XP_321075.3	mDest_maker-A2Random.62-augustus-gene-8.41-mRNA-1	aAeg_AAEL013325-PA	mDom_gi|557771118|ref|XP_005185221.1	gMor_GMOY011917_PA
sBull_maker-Contig_188-snap-gene-0.24-mRNA-1	lCup_FF38_05051	dMel_NP_536736.2	aGamb_XP_321134.5	mDest_augustus_masked-A2Random.62-abinit-gene-6.3-mRNA-1	aAeg_AAEL008247-PA	mDom_gi|557771120|ref|XP_005185222.1	gMor_GMOY011917_PA
sBull_maker-Contig_188-augustus-gene-0.6-mRNA-1	lCup_FF38_05046	dMel_NP_650975.1	aGamb_XP_321087.2	mDest_maker-A2Random.62-augustus-gene-8.40-mRNA-1	aAeg_AAEL012816-PA	mDom_gi|557771102|ref|XP_005185213.1	gMor_GMOY011915_PA
sBull_maker-Contig_1229-snap-gene-0.4-mRNA-1	lCup_FF38_01292	dMel_NP_524341.3	aGamb_XP_001689129.1	mDest_maker-X1.5-snap-gene-6.77-mRNA-1	aAeg_AAEL009518-PA	mDom_gi|755851560|ref|XP_005175599.2	gMor_GMOY006868_PA
sBull_maker-Contig_1971-augustus-gene-0.9-mRNA-1	lCup_FF38_10391	dMel_NP_648453.1	aGamb_XP_312040.5	mDest_maker-X2.17-augustus-gene-21.68-mRNA-1	aAeg_AAEL001581-PA	mDom_gi|557781214|ref|XP_005190226.1	gMor_GMOY011092_PA
sBull_maker-Contig_85-augustus-gene-0.26-mRNA-1	lCup_FF38_11063	dMel_NP_649782.1	aGamb_XP_312562.2	mDest_maker-X1.7-snap-gene-93.83-mRNA-1	aAeg_AAEL007481-PA	mDom_gi|557773508|ref|XP_005186407.1	gMor_GMOY010438_PA
sBull_maker-Contig_85-snap-gene-0.23-mRNA-1	lCup_FF38_11062	dMel_NP_650447.1	aGamb_XP_310939.3	mDest_snap_masked-X1Random.8-abinit-gene-16.63-mRNA-1	aAeg_AAEL008021-PA	mDom_gi|557763416|ref|XP_005181420.1	gMor_GMOY000073_PA
sBull_augustus_masked-Contig_85-processed-gene-3.18-mRNA-1	lCup_FF38_11071	dMel_NP_611223.4	aGamb_XP_320716.4	mDest_maker-Un.8362-augustus-gene-0.61-mRNA-1	aAeg_AAEL007871-PA	mDom_gi|557751797|ref|XP_005175652.1	gMor_GMOY001016_PA
sBull_snap_masked-Contig_85-processed-gene-4.6-mRNA-1	lCup_FF38_11055	dMel_NP_651118.1	aGamb_XP_309058.3	mDest_maker-X1.7-snap-gene-100.18-mRNA-1	aAeg_AAEL003230-PA	mDom_gi|557763422|ref|XP_005181423.1	gMor_GMOY000070_PA
sBull_maker-Contig_85-snap-gene-4.38-mRNA-1	lCup_FF38_11056	dMel_NP_524275.1	aGamb_XP_321348.3	mDest_maker-X1.7-snap-gene-93.84-mRNA-1	aAeg_AAEL004643-PA	mDom_gi|557773514|ref|XP_005186410.1	gMor_GMOY010437_PA
sBull_maker-Contig_0-augustus-gene-2.5-mRNA-1	lCup_FF38_08036	dMel_NP_524939.1	aGamb_XP_317543.4	mDest_maker-A1.42-snap-gene-3.3-mRNA-1	aAeg_AAEL000701-PA	mDom_gi|557779550|ref|XP_005189402.1	gMor_GMOY007167_PA
sBull_maker-Contig_0-snap-gene-6.22-mRNA-1	lCup_FF38_14271	dMel_NP_608574.2	aGamb_XP_316918.4	mDest_maker-A1.22-augustus-gene-5.93-mRNA-1	aAeg_AAEL012523-PA	mDom_gi|557779310|ref|XP_005189282.1	gMor_GMOY005116_PA
sBull_maker-Contig_0-snap-gene-6.26-mRNA-1	lCup_FF38_14277	dMel_NP_608573.1	aGamb_XP_554918.3	mDest_maker-A1.22-augustus-gene-5.95-mRNA-1	aAeg_AAEL012520-PA	mDom_gi|557779308|ref|XP_005189281.1	gMor_GMOY005117_PA
sBull_maker-Contig_0-augustus-gene-7.66-mRNA-1	lCup_FF38_14284	dMel_NP_608569.1	aGamb_XP_317773.4	mDest_augustus_masked-Un.10778-abinit-gene-0.8-mRNA-1	aAeg_AAEL014771-PA	mDom_gi|557763932|ref|XP_005181676.1	gMor_GMOY005121_PA
sBull_maker-Contig_0-snap-gene-13.34-mRNA-1	lCup_FF38_14312	dMel_NP_523451.2	aGamb_XP_318635.3	mDest_snap_masked-Un.2966-abinit-gene-0.1-mRNA-1	aAeg_AAEL007237-PA	mDom_gi|557752454|ref|XP_005175977.1	gMor_GMOY009755_PA
sBull_maker-Contig_0-snap-gene-17.50-mRNA-1	lCup_FF38_08066	dMel_NP_609922.2	aGamb_XP_317571.4	mDest_snap_masked-A1.24-abinit-gene-3.41-mRNA-1	aAeg_AAEL000685-PA	mDom_gi|557755703|ref|XP_005177590.1	gMor_GMOY007987_PA
sBull_snap_masked-Contig_0-processed-gene-17.11-mRNA-1	lCup_FF38_08059	dMel_NP_477145.1	aGamb_XP_313789.5	mDest_snap_masked-A1.36-abinit-gene-5.38-mRNA-1	aAeg_AAEL006209-PA	mDom_gi|557765861|ref|XP_005182628.1	gMor_GMOY008427_PA
sBull_maker-Contig_0-snap-gene-21.27-mRNA-1	lCup_FF38_07577	dMel_NP_608792.1	aGamb_XP_319614.4	mDest_maker-Un.12441-augustus-gene-0.5-mRNA-1	aAeg_AAEL008327-PA	mDom_gi|557763782|ref|XP_005181601.1	gMor_GMOY007032_PA
sBull_maker-Contig_0-augustus-gene-26.30-mRNA-1	lCup_FF38_13742	dMel_NP_608779.1	aGamb_XP_318422.5	mDest_augustus_masked-A2.9-abinit-gene-15.5-mRNA-1	aAeg_AAEL008135-PA	mDom_gi|557761231|ref|XP_005180335.1	gMor_GMOY001993_PA
sBull_maker-Contig_73-snap-gene-5.43-mRNA-1	lCup_FF38_12979	dMel_NP_524305.2	aGamb_XP_308768.3	mDest_maker-Un.1980-augustus-gene-0.36-mRNA-1	aAeg_AAEL013998-PA	mDom_gi|557772544|ref|XP_005185927.1	gMor_GMOY001679_PA
sBull_maker-Contig_3732-augustus-gene-0.5-mRNA-1	lCup_FF38_10381	dMel_NP_729680.1	aGamb_XP_312525.4	mDest_maker-A2.12-snap-gene-6.8-mRNA-1	aAeg_AAEL007809-PA	mDom_gi|557782659|ref|XP_005190941.1	gMor_GMOY001145_PA
sBull_maker-Contig_1746-snap-gene-0.0-mRNA-1	lCup_FF38_08652	dMel_NP_723549.1	aGamb_XP_315851.4	mDest_augustus_masked-X1.7-abinit-gene-41.11-mRNA-1	aAeg_AAEL008676-PA	mDom_gi|557771643|ref|XP_005185481.1	gMor_GMOY010354_PA
sBull_maker-Contig_2746-snap-gene-0.1-mRNA-1	lCup_FF38_09678	dMel_NP_611332.1	aGamb_XP_316333.3	mDest_maker-Un.18557-augustus-gene-5.34-mRNA-1	aAeg_AAEL002465-PA	mDom_gi|557751529|ref|XP_005175519.1	gMor_GMOY007116_PA
sBull_maker-Contig_1203-augustus-gene-0.6-mRNA-1	lCup_FF38_06971	dMel_NP_001188780.1	aGamb_XP_315523.4	mDest_maker-A1.3-augustus-gene-1.53-mRNA-1	aAeg_AAEL002377-PA	mDom_gi|557752150|ref|XP_005175826.1	gMor_GMOY010593_PA
sBull_maker-Contig_57-augustus-gene-5.37-mRNA-1	lCup_FF38_11862	dMel_NP_651728.1	aGamb_XP_316740.1	mDest_augustus_masked-X1Random.3-abinit-gene-8.6-mRNA-1	aAeg_AAEL005054-PA	mDom_gi|755882833|ref|XP_011293663.1	gMor_GMOY004621_PA
sBull_snap_masked-Contig_15-processed-gene-2.68-mRNA-1	lCup_FF38_07456	dMel_NP_609353.1	aGamb_XP_317811.4	mDest_maker-Un.4014-augustus-gene-0.3-mRNA-1	aAeg_AAEL006870-PA	mDom_gi|557784303|ref|XP_005191755.1	gMor_GMOY010215_PA
sBull_maker-Contig_15-augustus-gene-4.3-mRNA-1	lCup_FF38_10827	dMel_NP_609999.2	aGamb_XP_317120.3	mDest_augustus_masked-A1.10-abinit-gene-0.2-mRNA-1	aAeg_AAEL004740-PA	mDom_gi|557771076|ref|XP_005185200.1	gMor_GMOY006696_PA
sBull_maker-Contig_15-snap-gene-4.10-mRNA-1	lCup_FF38_10826	dMel_NP_610000.1	aGamb_XP_319936.4	mDest_maker-A1.7-augustus-gene-2.49-mRNA-1	aAeg_AAEL001171-PA	mDom_gi|557771078|ref|XP_005185201.1	gMor_GMOY006697_PA
sBull_maker-Contig_15-snap-gene-7.69-mRNA-1	lCup_FF38_02342	dMel_NP_788084.1	aGamb_XP_319773.4	mDest_augustus_masked-A1.15-abinit-gene-6.4-mRNA-1	aAeg_AAEL012265-PA	mDom_gi|557783334|ref|XP_005191275.1	gMor_GMOY007898_PA
sBull_maker-Contig_104-snap-gene-3.14-mRNA-1	lCup_FF38_08718	dMel_NP_611466.2	aGamb_XP_311420.4	mDest_snap_masked-Un.16430-abinit-gene-11.12-mRNA-1	aAeg_AAEL008724-PA	mDom_gi|557778812|ref|XP_005189034.1	gMor_GMOY009323_PA
sBull_maker-Contig_3816-augustus-gene-0.0-mRNA-1	lCup_FF38_12813	dMel_NP_651596.1	aGamb_XP_312666.3	mDest_maker-X1.7-snap-gene-57.23-mRNA-1	aAeg_AAEL010003-PB	mDom_gi|557769187|ref|XP_005184268.1	gMor_GMOY006256_PA
sBull_maker-Contig_3816-snap-gene-0.5-mRNA-1	lCup_FF38_12804	dMel_NP_524538.2	aGamb_XP_312665.4	mDest_maker-X1.7-augustus-gene-58.52-mRNA-1	aAeg_AAEL009994-PA	mDom_gi|557769189|ref|XP_005184269.1	gMor_GMOY006255_PA
sBull_augustus_masked-Contig_2-processed-gene-4.5-mRNA-1	lCup_FF38_13337	dMel_NP_610963.1	aGamb_XP_319576.4	mDest_maker-X2.13-augustus-gene-21.54-mRNA-1	aAeg_AAEL003543-PA	mDom_gi|557764197|ref|XP_005181807.1	gMor_GMOY007867_PA
sBull_maker-Contig_2-snap-gene-8.25-mRNA-1	lCup_FF38_11509	dMel_NP_652031.2	aGamb_XP_320065.4	mDest_maker-X2.8-augustus-gene-20.71-mRNA-1	aAeg_AAEL006441-PA	mDom_gi|557759556|ref|XP_005179502.1	gMor_GMOY002594_PA
sBull_maker-Contig_2-snap-gene-9.25-mRNA-1	lCup_FF38_01564	dMel_NP_523670.2	aGamb_XP_001238161.2	mDest_maker-X2.3-augustus-gene-8.54-mRNA-1	aAeg_AAEL007369-PA	mDom_gi|755856083|ref|XP_011296375.1	gMor_GMOY002956_PA
sBull_maker-Contig_2-snap-gene-9.32-mRNA-1	lCup_FF38_01568	dMel_NP_611074.1	aGamb_XP_317357.3	mDest_snap_masked-Un.8801-abinit-gene-0.12-mRNA-1	aAeg_AAEL005968-PA	mDom_gi|755856080|ref|XP_005177092.2	gMor_GMOY006601_PA
sBull_maker-Contig_2-snap-gene-10.25-mRNA-1	lCup_FF38_01580	dMel_NP_610953.1	aGamb_XP_317217.4	mDest_augustus_masked-Un.8801-abinit-gene-1.4-mRNA-1	aAeg_AAEL001725-PA	mDom_gi|557762884|ref|XP_005181155.1	gMor_GMOY003820_PA
sBull_maker-Contig_37-snap-gene-6.27-mRNA-1	lCup_FF38_11121	dMel_NP_647792.1	aGamb_XP_316499.2	mDest_maker-Un.21096-snap-gene-0.4-mRNA-1	aAeg_AAEL010843-PA	mDom_gi|557775220|ref|XP_005187256.1	gMor_GMOY003993_PA
sBull_maker-Contig_32161-augustus-gene-0.3-mRNA-1	lCup_FF38_12240	dMel_NP_610693.1	aGamb_XP_315568.3	mDest_augustus_masked-X2.8-abinit-gene-8.5-mRNA-1	aAeg_AAEL000567-PA	mDom_gi|557750055|ref|XP_005174792.1	gMor_GMOY004738_PA
sBull_maker-Contig_23127-augustus-gene-0.1-mRNA-1	lCup_FF38_10692	dMel_NP_649090.1	aGamb_XP_320550.3	mDest_maker-X1Random.10-augustus-gene-5.86-mRNA-1	aAeg_AAEL000673-PA	mDom_gi|557772787|ref|XP_005186048.1	gMor_GMOY009535_PA
sBull_maker-Contig_12722-snap-gene-0.4-mRNA-1	lCup_FF38_12829	dMel_NP_524431.2	aGamb_XP_307887.5	mDest_augustus_masked-X1Random.8-abinit-gene-25.0-mRNA-1	aAeg_AAEL005793-PA	mDom_gi|557763698|ref|XP_005181559.1	gMor_GMOY008723_PA
sBull_maker-Contig_21886-snap-gene-0.7-mRNA-1	lCup_FF38_05807	dMel_NP_611209.1	aGamb_XP_314784.2	mDest_maker-X2.13-augustus-gene-2.80-mRNA-1	aAeg_AAEL011317-PA	mDom_gi|557767146|ref|XP_005183264.1	gMor_GMOY001059_PA
sBull_maker-Contig_241-augustus-gene-1.42-mRNA-1	lCup_FF38_07155	dMel_NP_648586.2	aGamb_XP_313721.3	mDest_snap_masked-Un.17272-abinit-gene-3.15-mRNA-1	aAeg_AAEL000452-PA	mDom_gi|557763994|ref|XP_005181707.1	gMor_GMOY010188_PA
sBull_maker-Contig_241-snap-gene-1.65-mRNA-1	lCup_FF38_07156	dMel_NP_648590.1	aGamb_XP_315113.4	mDest_maker-A2.1-augustus-gene-22.73-mRNA-1	aAeg_AAEL010118-PA	mDom_gi|557763986|ref|XP_005181703.1	gMor_GMOY010190_PA
sBull_augustus_masked-Contig_241-processed-gene-1.56-mRNA-1	lCup_FF38_07152	dMel_NP_648589.1	aGamb_XP_309297.2	mDest_augustus_masked-A1.32-abinit-gene-12.11-mRNA-1	aAeg_AAEL009497-PA	mDom_gi|557763984|ref|XP_005181702.1	gMor_GMOY010191_PA
sBull_maker-Contig_260-snap-gene-1.9-mRNA-1	lCup_FF38_07381	dMel_NP_609845.1	aGamb_XP_318578.3	mDest_snap_masked-A1.3-abinit-gene-6.29-mRNA-1	aAeg_AAEL000332-PA	mDom_gi|557766164|ref|XP_005182778.1	gMor_GMOY011102_PA
sBull_maker-Contig_1758-snap-gene-0.12-mRNA-1	lCup_FF38_13286	dMel_NP_610024.1	aGamb_XP_317417.3	mDest_maker-A1.15-snap-gene-6.4-mRNA-1	aAeg_AAEL001972-PA	mDom_gi|557767519|ref|XP_005183448.1	gMor_GMOY007490_PA
sBull_snap_masked-Contig_32205-processed-gene-0.0-mRNA-1	lCup_FF38_12099	dMel_NP_610361.1	aGamb_XP_308236.4	mDest_maker-A1.47-augustus-gene-9.72-mRNA-1	aAeg_AAEL005197-PA	mDom_gi|557758727|ref|XP_005179090.1	gMor_GMOY007398_PA
sBull_maker-Contig_13843-snap-gene-0.8-mRNA-1	lCup_FF38_06008	dMel_NP_523369.2	aGamb_XP_320116.6	mDest_maker-X1Random.2-augustus-gene-16.94-mRNA-1	aAeg_AAEL010069-PA	mDom_gi|755866765|ref|XP_011291300.1	gMor_GMOY007137_PA
sBull_maker-Contig_1340-augustus-gene-0.1-mRNA-1	lCup_FF38_03012	dMel_NP_611092.2	aGamb_XP_320235.4	mDest_snap_masked-X2.10-abinit-gene-3.45-mRNA-1	aAeg_AAEL007877-PA	mDom_gi|557770823|ref|XP_005185074.1	gMor_GMOY005417_PA
sBull_maker-Contig_11-snap-gene-10.72-mRNA-1	lCup_FF38_09750	dMel_NP_611010.4	aGamb_XP_309354.4	mDest_maker-Un.20744-augustus-gene-1.41-mRNA-1	aAeg_AAEL003824-PA	mDom_gi|557773798|ref|XP_005186550.1	gMor_GMOY010126_PA
sBull_augustus_masked-Contig_20-processed-gene-0.20-mRNA-1	lCup_FF38_10876	dMel_NP_609441.1	aGamb_XP_322034.3	mDest_augustus_masked-A2.13-abinit-gene-7.5-mRNA-1	aAeg_AAEL010276-PA	mDom_gi|557783022|ref|XP_005191121.1	gMor_GMOY001137_PA
sBull_maker-Contig_20-snap-gene-0.37-mRNA-1	lCup_FF38_10878	dMel_NP_476980.1	aGamb_XP_316568.4	mDest_snap_masked-X1.7-abinit-gene-105.43-mRNA-1	aAeg_AAEL011242-PA	mDom_gi|557783008|ref|XP_005191114.1	gMor_GMOY001141_PA
sBull_maker-Contig_20-augustus-gene-1.6-mRNA-1	lCup_FF38_02866	dMel_NP_649304.1	aGamb_XP_307850.4	mDest_maker-X2.7-augustus-gene-4.37-mRNA-1	aAeg_AAEL004493-PA	mDom_gi|557764286|ref|XP_005181851.1	gMor_GMOY001130_PA
sBull_maker-Contig_20-snap-gene-3.15-mRNA-1	lCup_FF38_06231	dMel_NP_648841.1	aGamb_XP_312410.3	mDest_maker-A2.7-snap-gene-6.82-mRNA-1	aAeg_AAEL008255-PA	mDom_gi|557774932|ref|XP_005187113.1	gMor_GMOY001027_PA
sBull_maker-Contig_20-snap-gene-4.40-mRNA-1	lCup_FF38_03140	dMel_NP_648320.1	aGamb_XP_315542.3	mDest_maker-X1.7-augustus-gene-71.40-mRNA-1	aAeg_AAEL010968-PA	mDom_gi|557770183|ref|XP_005184760.1	gMor_GMOY000878_PA
sBull_maker-Contig_20-augustus-gene-4.37-mRNA-1	lCup_FF38_03136	dMel_NP_648472.1	aGamb_XP_308535.4	mDest_augustus_masked-X2.4-abinit-gene-3.6-mRNA-1	aAeg_AAEL010653-PA	mDom_gi|557764547|ref|XP_005181980.1	gMor_GMOY001199_PA
sBull_maker-Contig_20-snap-gene-4.44-mRNA-1	lCup_FF38_03138	dMel_NP_729504.2	aGamb_XP_321953.1	mDest_maker-A2.8-snap-gene-0.7-mRNA-1	aAeg_AAEL005622-PA	mDom_gi|755878550|ref|XP_011293026.1	gMor_GMOY000880_PA
sBull_maker-Contig_6028-augustus-gene-0.8-mRNA-1	lCup_FF38_01748	dMel_NP_652001.2	aGamb_XP_316421.3	mDest_maker-A1.46-augustus-gene-20.40-mRNA-1	aAeg_AAEL004698-PA	mDom_gi|557772114|ref|XP_005185715.1	gMor_GMOY007517_PA
sBull_maker-Contig_233-snap-gene-1.20-mRNA-1	lCup_FF38_10779	dMel_NP_650702.1	aGamb_XP_312442.5	mDest_augustus_masked-Un.21950-abinit-gene-3.13-mRNA-1	aAeg_AAEL001144-PA	mDom_gi|557777139|ref|XP_005188205.1	gMor_GMOY011325_PA
sBull_maker-Contig_233-snap-gene-1.24-mRNA-1	lCup_FF38_10772	dMel_NP_609219.1	aGamb_XP_320311.3	mDest_maker-X2.13-augustus-gene-2.74-mRNA-1	aAeg_AAEL007677-PA	mDom_gi|557777137|ref|XP_005188204.1	gMor_GMOY011319_PA
sBull_maker-Contig_64-snap-gene-2.1-mRNA-1	lCup_FF38_14211	dMel_NP_731873.1	aGamb_XP_310617.4	mDest_maker-X1.7-snap-gene-60.2-mRNA-1	aAeg_AAEL007457-PA	mDom_gi|557756775|ref|XP_005178123.1	gMor_GMOY008096_PA
sBull_maker-Contig_64-snap-gene-5.87-mRNA-1	lCup_FF38_01214	dMel_NP_651363.1	aGamb_XP_318434.3	mDest_maker-A2.9-augustus-gene-16.55-mRNA-1	aAeg_AAEL001048-PA	mDom_gi|557756682|ref|XP_005178077.1	gMor_GMOY011159_PA
sBull_maker-Contig_64-augustus-gene-5.67-mRNA-1	lCup_FF38_01213	dMel_NP_650136.1	aGamb_XP_313297.3	mDest_maker-A2.9-snap-gene-5.75-mRNA-1	aAeg_AAEL000459-PA	mDom_gi|557773061|ref|XP_005186184.1	gMor_GMOY011153_PA
sBull_augustus_masked-Contig_110-processed-gene-2.16-mRNA-1	lCup_FF38_05497	dMel_NP_524675.1	aGamb_XP_315885.2	mDest_maker-X1Random.2-snap-gene-3.5-mRNA-1	aAeg_AAEL010037-PA	mDom_gi|557776942|ref|XP_005188107.1	gMor_GMOY007736_PA
sBull_maker-Contig_8570-snap-gene-0.9-mRNA-1	lCup_FF38_10370	dMel_NP_524022.1	aGamb_XP_311498.2	mDest_maker-A2.12-augustus-gene-11.32-mRNA-1	aAeg_AAEL000210-PA	mDom_gi|557774435|ref|XP_005186866.1	gMor_GMOY008282_PA
sBull_maker-Contig_52-snap-gene-4.0-mRNA-1	lCup_FF38_00243	dMel_NP_524284.1	aGamb_XP_322023.2	mDest_augustus_masked-A1.41-abinit-gene-18.0-mRNA-1	aAeg_AAEL004306-PA	mDom_gi|557782641|ref|XP_005190932.1	gMor_GMOY011893_PA
sBull_maker-Contig_52-snap-gene-4.11-mRNA-1	lCup_FF38_00248	dMel_NP_649813.1	aGamb_XP_312002.3	mDest_maker-A2.10-snap-gene-3.82-mRNA-1	aAeg_AAEL013898-PA	mDom_gi|557782643|ref|XP_005190933.1	gMor_GMOY011894_PA
sBull_maker-Contig_52-snap-gene-5.13-mRNA-1	lCup_FF38_00251	dMel_NP_651883.1	aGamb_XP_312148.3	mDest_maker-A2.7-snap-gene-0.53-mRNA-1	aAeg_AAEL003938-PA	mDom_gi|557771343|ref|XP_005185333.1	gMor_GMOY003373_PA
sBull_maker-Contig_256-snap-gene-0.15-mRNA-1	lCup_FF38_10331	dMel_NP_650223.1	aGamb_XP_565619.1	mDest_augustus_masked-A2.1-abinit-gene-17.7-mRNA-1	aAeg_AAEL012764-PA	mDom_gi|557777402|ref|XP_005188335.1	gMor_GMOY012105_PA
sBull_maker-Contig_256-augustus-gene-1.65-mRNA-1	lCup_FF38_12419	dMel_NP_524328.1	aGamb_XP_550819.1	mDest_maker-A2.12-augustus-gene-12.33-mRNA-1	aAeg_AAEL006061-PA	mDom_gi|557777450|ref|XP_005188359.1	gMor_GMOY011783_PA
sBull_maker-Contig_256-snap-gene-1.10-mRNA-1	lCup_FF38_12424	dMel_NP_650195.1	aGamb_XP_313756.5	mDest_maker-X2.17-augustus-gene-21.66-mRNA-1	aAeg_AAEL000097-PC	mDom_gi|755888524|ref|XP_005188374.2	gMor_GMOY011926_PA
sBull_augustus_masked-Contig_256-processed-gene-1.93-mRNA-1	lCup_FF38_10322	dMel_NP_536750.2	aGamb_XP_321114.1	mDest_augustus_masked-A2.7-abinit-gene-1.12-mRNA-1	aAeg_AAEL003374-PA	mDom_gi|557777408|ref|XP_005188338.1	gMor_GMOY011188_PA
sBull_snap_masked-Contig_284-processed-gene-1.60-mRNA-1	lCup_FF38_12567	dMel_NP_651582.1	aGamb_XP_315531.3	mDest_maker-X1Random.8-augustus-gene-32.43-mRNA-1	aAeg_AAEL011271-PA	mDom_gi|557769849|ref|XP_005184596.1	gMor_GMOY005676_PA
sBull_augustus_masked-Contig_284-processed-gene-1.36-mRNA-1	lCup_FF38_04981	dMel_NP_524537.1	aGamb_XP_001237070.2	mDest_maker-X2.8-snap-gene-10.18-mRNA-1	aAeg_AAEL002728-PA	mDom_gi|557769853|ref|XP_005184598.1	gMor_GMOY005675_PA
sBull_maker-Contig_284-snap-gene-1.21-mRNA-1	lCup_FF38_12572	dMel_NP_477509.1	aGamb_XP_320974.3	mDest_augustus_masked-A1.35-abinit-gene-0.3-mRNA-1	aAeg_AAEL012209-PA	mDom_gi|557775049|ref|XP_005187171.1	gMor_GMOY005679_PB
sBull_maker-Contig_533-snap-gene-0.15-mRNA-1	lCup_FF38_10973	dMel_NP_996042.1	aGamb_XP_552825.2	mDest_maker-X1.3-snap-gene-1.34-mRNA-2	aAeg_AAEL006404-PA	mDom_gi|557782842|ref|XP_005191031.1	gMor_GMOY002404_PA
sBull_maker-Contig_115-augustus-gene-1.31-mRNA-1	lCup_FF38_08497	dMel_NP_650459.1	aGamb_XP_001689007.1	mDest_maker-Un.23482-augustus-gene-0.0-mRNA-1	aAeg_AAEL006420-PA	mDom_gi|557771011|ref|XP_005185168.1	gMor_GMOY000951_PA
sBull_snap_masked-Contig_115-processed-gene-4.7-mRNA-1	lCup_FF38_07656	dMel_NP_651084.1	aGamb_XP_317755.3	mDest_maker-A1.26-augustus-gene-0.32-mRNA-1	aAeg_AAEL013800-PA	mDom_gi|557776657|ref|XP_005187967.1	gMor_GMOY011990_PA
sBull_snap_masked-Contig_15319-processed-gene-0.4-mRNA-1	lCup_FF38_10219	dMel_NP_477436.1	aGamb_XP_555381.3	mDest_augustus_masked-X1Random.2-abinit-gene-30.1-mRNA-1	aAeg_AAEL008592-PA	mDom_gi|557774660|ref|XP_005186977.1	gMor_GMOY008669_PA
sBull_maker-Contig_6965-augustus-gene-0.6-mRNA-1	lCup_FF38_12594	dMel_NP_732721.1	aGamb_XP_311020.4	mDest_maker-X1Random.8-snap-gene-14.9-mRNA-1	aAeg_AAEL012105-PA	mDom_gi|557760413|ref|XP_005179927.1	gMor_GMOY003200_PA
sBull_maker-Contig_270-augustus-gene-0.4-mRNA-1	lCup_FF38_05072	dMel_NP_476848.1	aGamb_XP_313156.2	mDest_maker-X1Random.38-augustus-gene-3.49-mRNA-1	aAeg_AAEL013397-PA	mDom_gi|557779809|ref|XP_005189529.1	gMor_GMOY005337_PA
sBull_maker-Contig_270-snap-gene-0.18-mRNA-1	lCup_FF38_05068	dMel_NP_650402.1	aGamb_XP_309119.5	mDest_maker-X1.7-snap-gene-48.12-mRNA-1	aAeg_AAEL005436-PA	mDom_gi|557759836|ref|XP_005179642.1	gMor_GMOY005335_PA
sBull_maker-Contig_4423-snap-gene-0.2-mRNA-1	lCup_FF38_00361	dMel_NP_608835.1	aGamb_XP_319697.2	mDest_maker-Un.438-augustus-gene-1.49-mRNA-1	aAeg_AAEL006409-PA	mDom_gi|557762214|ref|XP_005180821.1	gMor_GMOY010019_PA
sBull_maker-Contig_379-snap-gene-0.29-mRNA-1	lCup_FF38_07374	dMel_NP_610746.1	aGamb_XP_320692.4	mDest_maker-X1.1-augustus-gene-33.68-mRNA-1	aAeg_AAEL012325-PA	mDom_gi|755889507|ref|XP_011294631.1	gMor_GMOY010718_PA
sBull_snap_masked-Contig_379-processed-gene-0.115-mRNA-1	lCup_FF38_13730	dMel_NP_610528.1	aGamb_XP_559058.3	mDest_maker-X2.16-snap-gene-8.20-mRNA-1	aAeg_AAEL000844-PA	mDom_gi|557784897|ref|XP_005192050.1	gMor_GMOY000127_PA
sBull_maker-Contig_575-augustus-gene-0.46-mRNA-1	lCup_FF38_04801	dMel_NP_647946.1	aGamb_XP_308397.4	mDest_maker-Un.9450-augustus-gene-0.6-mRNA-1	aAeg_AAEL006224-PA	mDom_gi|557762310|ref|XP_005180869.1	gMor_GMOY000598_PA
sBull_augustus_masked-Contig_373-processed-gene-0.27-mRNA-1	lCup_FF38_13553	dMel_NP_650048.1	aGamb_XP_312257.2	mDest_maker-Un.17707-augustus-gene-0.3-mRNA-1	aAeg_AAEL003872-PA	mDom_gi|557763374|ref|XP_005181399.1	gMor_GMOY011666_PA
sBull_maker-Contig_2451-augustus-gene-0.8-mRNA-1	lCup_FF38_08966	dMel_NP_572355.1	aGamb_XP_318380.5	mDest_augustus_masked-X2Random.32-abinit-gene-1.8-mRNA-1	aAeg_AAEL002996-PA	mDom_gi|755868119|ref|XP_005181147.2	gMor_GMOY005182_PA
sBull_maker-Contig_585-snap-gene-0.24-mRNA-1	lCup_FF38_01529	dMel_NP_524887.2	aGamb_XP_309798.4	mDest_maker-A2Random.62-snap-gene-1.78-mRNA-1	aAeg_AAEL005856-PA	mDom_gi|557759317|ref|XP_005179383.1	gMor_GMOY002768_PA
sBull_maker-Contig_6125-augustus-gene-0.1-mRNA-1	lCup_FF38_03404	dMel_NP_649796.1	aGamb_XP_315727.4	mDest_maker-Un.7911-augustus-gene-0.7-mRNA-1	aAeg_AAEL005985-PA	mDom_gi|557773003|ref|XP_005186155.1	gMor_GMOY005132_PA
sBull_augustus_masked-Contig_17335-processed-gene-0.2-mRNA-1	lCup_FF38_02189	dMel_NP_611750.1	aGamb_XP_320648.4	mDest_maker-Un.23261-snap-gene-2.16-mRNA-1	aAeg_AAEL009394-PA	mDom_gi|755855809|ref|XP_011296341.1	gMor_GMOY009409_PA
sBull_snap_masked-Contig_17335-processed-gene-0.1-mRNA-1	lCup_FF38_02186	dMel_NP_610617.1	aGamb_XP_314488.4	mDest_snap_masked-Un.23261-abinit-gene-2.65-mRNA-1	aAeg_AAEL005880-PA	mDom_gi|557754505|ref|XP_005176996.1	gMor_GMOY009408_PA
sBull_maker-Contig_153-augustus-gene-3.9-mRNA-1	lCup_FF38_13487	dMel_NP_648080.1	aGamb_XP_308406.4	mDest_maker-A1.33-snap-gene-13.3-mRNA-1	aAeg_AAEL009211-PA	mDom_gi|557754569|ref|XP_005177027.1	gMor_GMOY004077_PA
sBull_maker-Contig_6267-snap-gene-0.5-mRNA-1	lCup_FF38_05008	dMel_NP_649981.1	aGamb_XP_313797.5	mDest_maker-X1Random.2-augustus-gene-11.67-mRNA-1	aAeg_AAEL014044-PA	mDom_gi|557759834|ref|XP_005179641.1	gMor_GMOY005282_PA
sBull_augustus_masked-Contig_17-processed-gene-1.21-mRNA-1	lCup_FF38_02517	dMel_NP_650821.2	aGamb_XP_314898.4	mDest_snap_masked-X2.10-abinit-gene-4.26-mRNA-1	aAeg_AAEL001029-PA	mDom_gi|557767706|ref|XP_005183541.1	gMor_GMOY004158_PA
sBull_maker-Contig_17-snap-gene-4.1-mRNA-1	lCup_FF38_13075	dMel_NP_650540.1	aGamb_XP_321357.4	mDest_maker-X1Random.2-snap-gene-30.7-mRNA-1	aAeg_AAEL004866-PA	mDom_gi|557770354|ref|XP_005184845.1	gMor_GMOY010008_PA
sBull_augustus_masked-Contig_17-processed-gene-6.8-mRNA-1	lCup_FF38_00820	dMel_NP_649589.1	aGamb_XP_320122.5	mDest_maker-X2.1-snap-gene-4.92-mRNA-1	aAeg_AAEL001300-PA	mDom_gi|557783827|ref|XP_005191520.1	gMor_GMOY009971_PA
sBull_maker-Contig_17-snap-gene-6.51-mRNA-1	lCup_FF38_00822	dMel_NP_649588.1	aGamb_XP_556176.3	mDest_maker-Un.19389-snap-gene-0.10-mRNA-1	aAeg_AAEL014325-PA	mDom_gi|557783831|ref|XP_005191522.1	gMor_GMOY011646_PA
sBull_maker-Contig_17-snap-gene-7.43-mRNA-1	lCup_FF38_00831	dMel_NP_730996.2	aGamb_XP_321399.5	mDest_maker-A2Random.62-augustus-gene-3.35-mRNA-1	aAeg_AAEL006185-PA	mDom_gi|557766886|ref|XP_005183135.1	gMor_GMOY011639_PA
sBull_maker-Contig_1067-augustus-gene-0.31-mRNA-1	lCup_FF38_08489	dMel_NP_524246.1	aGamb_XP_312144.5	mDest_maker-A2.9-augustus-gene-3.42-mRNA-1	aAeg_AAEL003945-PA	mDom_gi|557769391|ref|XP_005184369.1	gMor_GMOY000274_PA
sBull_maker-Contig_7185-snap-gene-0.8-mRNA-1	lCup_FF38_05803	dMel_NP_611531.2	aGamb_XP_314789.4	mDest_snap_masked-X2.17-abinit-gene-17.43-mRNA-1	aAeg_AAEL011311-PA	mDom_gi|557767164|ref|XP_005183273.1	gMor_GMOY007982_PA
sBull_maker-Contig_6882-snap-gene-0.17-mRNA-1	lCup_FF38_10376	dMel_NP_648756.1	aGamb_XP_320385.4	mDest_augustus_masked-A2.13-abinit-gene-1.1-mRNA-1	aAeg_AAEL017543-PA	mDom_gi|557762928|ref|XP_005181177.1	gMor_GMOY004017_PA
sBull_maker-Contig_129-augustus-gene-3.6-mRNA-1	lCup_FF38_04833	dMel_NP_650486.1	aGamb_XP_321248.5	mDest_maker-A2.1-augustus-gene-21.128-mRNA-1	aAeg_AAEL013194-PA	mDom_gi|557765845|ref|XP_005182620.1	gMor_GMOY011404_PA
sBull_maker-Contig_6643-snap-gene-0.14-mRNA-1	lCup_FF38_07805	dMel_NP_610854.1	aGamb_XP_318858.4	mDest_augustus_masked-X2.3-abinit-gene-9.9-mRNA-1	aAeg_AAEL010042-PA	mDom_gi|557756026|ref|XP_005177751.1	gMor_GMOY010911_PA
sBull_maker-Contig_412-augustus-gene-0.29-mRNA-1	lCup_FF38_13402	dMel_NP_650248.1	aGamb_XP_310115.3	mDest_augustus_masked-A1.3-abinit-gene-10.3-mRNA-1	aAeg_AAEL005573-PA	mDom_gi|557779066|ref|XP_005189160.1	gMor_GMOY001893_PA
sBull_maker-Contig_412-snap-gene-0.3-mRNA-1	lCup_FF38_01015	dMel_NP_611232.1	aGamb_XP_309340.4	mDest_maker-X2Random.32-snap-gene-0.2-mRNA-1	aAeg_AAEL003293-PA	mDom_gi|557757038|ref|XP_005178252.1	gMor_GMOY001884_PA
sBull_maker-Contig_562-snap-gene-0.1-mRNA-1	lCup_FF38_13264	dMel_NP_477006.1	aGamb_XP_321151.4	mDest_maker-A2.1-snap-gene-10.12-mRNA-1	aAeg_AAEL010057-PA	mDom_gi|557763370|ref|XP_005181397.1	gMor_GMOY008002_PA
sBull_maker-Contig_78-snap-gene-3.45-mRNA-1	lCup_FF38_05664	dMel_NP_569872.1	aGamb_XP_320117.3	mDest_augustus_masked-A1Random.66-abinit-gene-16.0-mRNA-1	aAeg_AAEL010077-PA	mDom_gi|557754186|ref|XP_005176837.1	gMor_GMOY003265_PA
sBull_augustus_masked-Contig_12754-processed-gene-0.3-mRNA-1	lCup_FF38_13198	dMel_NP_649026.1	aGamb_XP_316379.4	mDest_maker-Un.13641-snap-gene-0.33-mRNA-1	aAeg_AAEL003070-PA	mDom_gi|557753997|ref|XP_005176743.1	gMor_GMOY007609_PA
sBull_maker-Contig_7713-snap-gene-0.7-mRNA-1	lCup_FF38_00419	dMel_NP_651211.2	aGamb_XP_311953.3	mDest_maker-X1.2-augustus-gene-5.68-mRNA-1	aAeg_AAEL005802-PA	mDom_gi|557753394|ref|XP_005176442.1	gMor_GMOY003703_PA
sBull_maker-Contig_7009-snap-gene-0.9-mRNA-1	lCup_FF38_05728	dMel_NP_649083.2	aGamb_XP_320147.4	mDest_maker-Un.17588-augustus-gene-20.52-mRNA-1	aAeg_AAEL000674-PA	mDom_gi|557754961|ref|XP_005177223.1	gMor_GMOY002044_PA
sBull_maker-Contig_25-snap-gene-0.6-mRNA-1	lCup_FF38_04461	dMel_NP_610695.1	aGamb_XP_309954.4	mDest_snap_masked-X1.4-abinit-gene-0.17-mRNA-1	aAeg_AAEL001522-PA	mDom_gi|755882363|ref|XP_011293601.1	gMor_GMOY000586_PA
sBull_snap_masked-Contig_25-processed-gene-1.16-mRNA-1	lCup_FF38_10604	dMel_NP_610526.1	aGamb_XP_318645.4	mDest_snap_masked-Un.19431-abinit-gene-4.16-mRNA-1	aAeg_AAEL004526-PA	mDom_gi|557762456|ref|XP_005180942.1	gMor_GMOY010428_PA
sBull_maker-Contig_13239-snap-gene-0.1-mRNA-1	lCup_FF38_04710	dMel_NP_524191.1	aGamb_XP_316475.4	mDest_maker-Un.549-augustus-gene-3.15-mRNA-1	aAeg_AAEL002253-PA	mDom_gi|557768534|ref|XP_005183946.1	gMor_GMOY008868_PA
sBull_augustus_masked-Contig_20722-processed-gene-0.2-mRNA-1	lCup_FF38_08331	dMel_NP_610798.1	aGamb_XP_308378.4	mDest_augustus_masked-X1.7-abinit-gene-57.13-mRNA-1	aAeg_AAEL007547-PA	mDom_gi|557782782|ref|XP_005191002.1	gMor_GMOY007676_PA
sBull_maker-Contig_7047-augustus-gene-0.5-mRNA-1	lCup_FF38_02193	dMel_NP_611140.3	aGamb_XP_313366.5	mDest_maker-X2.1-augustus-gene-7.22-mRNA-1	aAeg_AAEL007296-PA	mDom_gi|557754509|ref|XP_005176998.1	gMor_GMOY009406_PA
sBull_maker-Contig_18848-augustus-gene-0.2-mRNA-1	lCup_FF38_02768	dMel_NP_651307.2	aGamb_XP_320996.5	mDest_maker-Un.19865-augustus-gene-7.23-mRNA-1	aAeg_AAEL011269-PA	mDom_gi|755852249|ref|XP_005175817.2	gMor_GMOY007475_PA
sBull_maker-Contig_321-snap-gene-0.13-mRNA-1	lCup_FF38_12845	dMel_NP_732637.1	aGamb_XP_313453.5	mDest_maker-X1.7-augustus-gene-107.24-mRNA-1	aAeg_AAEL006597-PA	mDom_gi|557761761|ref|XP_005180598.1	gMor_GMOY000031_PA
sBull_snap_masked-Contig_7439-processed-gene-0.3-mRNA-1	lCup_FF38_01151	dMel_NP_647892.1	aGamb_XP_308171.3	mDest_maker-A2.12-augustus-gene-25.80-mRNA-1	aAeg_AAEL002719-PA	mDom_gi|557778862|ref|XP_005189058.1	gMor_GMOY007727_PA
sBull_maker-Contig_138-snap-gene-1.37-mRNA-1	lCup_FF38_07992	dMel_NP_610086.3	aGamb_XP_317524.4	mDest_maker-A1.23-snap-gene-4.72-mRNA-1	aAeg_AAEL006610-PA	mDom_gi|557769147|ref|XP_005184248.1	gMor_GMOY004257_PA
sBull_snap_masked-Contig_146-processed-gene-2.31-mRNA-1	lCup_FF38_14101	dMel_NP_651595.1	aGamb_XP_320985.2	mDest_augustus_masked-Un.9075-abinit-gene-0.1-mRNA-1	aAeg_AAEL010045-PA	mDom_gi|557784124|ref|XP_005191666.1	gMor_GMOY009523_PA
sBull_augustus_masked-Contig_146-processed-gene-3.61-mRNA-1	lCup_FF38_09324	dMel_NP_651217.2	aGamb_XP_311741.5	mDest_snap_masked-X1.7-abinit-gene-92.46-mRNA-1	aAeg_AAEL009908-PA	mDom_gi|755885383|ref|XP_011294046.1	gMor_GMOY009507_PA
sBull_maker-Contig_146-snap-gene-3.29-mRNA-1	lCup_FF38_01378	dMel_NP_651224.1	aGamb_XP_313693.4	mDest_maker-X1.7-snap-gene-93.93-mRNA-1	aAeg_AAEL010584-PA	mDom_gi|557777964|ref|XP_005188615.1	gMor_GMOY009521_PA
sBull_maker-Contig_146-snap-gene-3.43-mRNA-1	lCup_FF38_09329	dMel_NP_523422.4	aGamb_XP_316580.4	mDest_maker-Un.6149-augustus-gene-0.3-mRNA-1	aAeg_AAEL013167-PA	mDom_gi|557777950|ref|XP_005188608.1	gMor_GMOY012992_PA
sBull_maker-Contig_296-augustus-gene-1.6-mRNA-1	lCup_FF38_12787	dMel_NP_652072.1	aGamb_XP_311944.4	mDest_maker-A2.1-snap-gene-18.88-mRNA-1	aAeg_AAEL006707-PA	mDom_gi|557759455|ref|XP_005179452.1	gMor_GMOY011522_PA
sBull_maker-Contig_99-snap-gene-0.23-mRNA-1	lCup_FF38_14423	dMel_NP_477448.1	aGamb_XP_316950.4	mDest_maker-A1.18-augustus-gene-3.53-mRNA-1	aAeg_AAEL002240-PA	mDom_gi|557755689|ref|XP_005177583.1	gMor_GMOY002316_PA
sBull_maker-Contig_99-snap-gene-1.19-mRNA-1	lCup_FF38_14420	dMel_NP_477449.1	aGamb_XP_316952.2	mDest_maker-A1.18-augustus-gene-3.60-mRNA-1	aAeg_AAEL002219-PA	mDom_gi|557755705|ref|XP_005177591.1	gMor_GMOY001936_PA
sBull_maker-Contig_25329-snap-gene-0.1-mRNA-1	lCup_FF38_12064	dMel_NP_524881.2	aGamb_XP_003435770.1	mDest_augustus_masked-Un.1540-abinit-gene-3.1-mRNA-1	aAeg_AAEL009851-PA	mDom_gi|755874712|ref|XP_011292459.1	gMor_GMOY003416_PA
sBull_maker-Contig_30292-snap-gene-0.0-mRNA-1	lCup_FF38_10802	dMel_NP_610455.1	aGamb_XP_314731.4	mDest_maker-A1.27-augustus-gene-8.49-mRNA-1	aAeg_AAEL008852-PA	mDom_gi|557751771|ref|XP_005175639.1	gMor_GMOY006435_PA
sBull_maker-Contig_4241-snap-gene-0.16-mRNA-1	lCup_FF38_00192	dMel_NP_572434.1	aGamb_XP_310780.5	mDest_augustus_masked-A1.46-abinit-gene-5.8-mRNA-1	aAeg_AAEL010598-PA	mDom_gi|557755738|ref|XP_005177607.1	gMor_GMOY008273_PA
sBull_maker-Contig_645-augustus-gene-0.6-mRNA-1	lCup_FF38_05896	dMel_NP_648625.1	aGamb_XP_309572.4	mDest_maker-Un.16859-snap-gene-0.0-mRNA-1	aAeg_AAEL010315-PA	mDom_gi|557775931|ref|XP_005187610.1	gMor_GMOY013033_PA
sBull_maker-Contig_645-snap-gene-0.44-mRNA-1	lCup_FF38_05888	dMel_NP_649158.1	aGamb_XP_563695.1	mDest_maker-X1.1-snap-gene-26.15-mRNA-1	aAeg_AAEL006315-PA	mDom_gi|557775919|ref|XP_005187604.1	gMor_GMOY002319_PA
sBull_maker-Contig_4765-augustus-gene-0.2-mRNA-1	lCup_FF38_06583	dMel_NP_610097.2	aGamb_XP_314834.4	mDest_maker-Un.21950-augustus-gene-4.86-mRNA-1	aAeg_AAEL004302-PA	mDom_gi|557769776|ref|XP_005184561.1	gMor_GMOY005705_PA
sBull_maker-Contig_8340-snap-gene-0.3-mRNA-1	lCup_FF38_00428	dMel_NP_732364.1	aGamb_XP_312898.3	mDest_maker-A2.11-augustus-gene-5.65-mRNA-1	aAeg_AAEL000163-PA	mDom_gi|755854183|ref|XP_005176446.2	gMor_GMOY007040_PA
sBull_maker-Contig_30-augustus-gene-3.1-mRNA-1	lCup_FF38_09960	dMel_NP_572402.1	aGamb_XP_320419.3	mDest_maker-X2.8-augustus-gene-8.58-mRNA-1	aAeg_AAEL014752-PA	mDom_gi|557772510|ref|XP_005185910.1	gMor_GMOY009699_PA
sBull_maker-Contig_30-snap-gene-3.23-mRNA-1	lCup_FF38_09949	dMel_NP_572915.1	aGamb_XP_309073.4	mDest_maker-Un.18557-snap-gene-8.29-mRNA-1	aAeg_AAEL018297-PA	mDom_gi|557768831|ref|XP_005184091.1	gMor_GMOY009704_PA
sBull_maker-Contig_30-snap-gene-3.22-mRNA-1	lCup_FF38_09951	dMel_NP_649990.2	aGamb_XP_321669.3	mDest_snap_masked-A2.11-abinit-gene-6.59-mRNA-1	aAeg_AAEL011473-PA	mDom_gi|557768841|ref|XP_005184096.1	gMor_GMOY009702_PA
sBull_snap_masked-Contig_30-processed-gene-3.49-mRNA-1	lCup_FF38_09957	dMel_NP_572401.2	aGamb_XP_310209.4	mDest_maker-Un.19431-augustus-gene-2.25-mRNA-1	aAeg_AAEL006532-PA	mDom_gi|557772512|ref|XP_005185911.1	gMor_GMOY009700_PA
sBull_augustus_masked-Contig_30-processed-gene-6.0-mRNA-1	lCup_FF38_09944	dMel_NP_573044.1	aGamb_XP_316797.3	mDest_maker-A1.27-snap-gene-8.57-mRNA-1	aAeg_AAEL013114-PA	mDom_gi|557779182|ref|XP_005189218.1	gMor_GMOY003438_PA
sBull_maker-Contig_74-augustus-gene-1.37-mRNA-1	lCup_FF38_01427	dMel_NP_648188.2	aGamb_XP_316567.4	mDest_augustus_masked-X1Random.8-abinit-gene-28.10-mRNA-1	aAeg_AAEL011245-PA	mDom_gi|557776424|ref|XP_005187852.1	gMor_GMOY011946_PA
sBull_maker-Contig_602-augustus-gene-0.18-mRNA-1	lCup_FF38_09307	dMel_NP_649127.1	aGamb_XP_308615.4	mDest_maker-Un.17378-augustus-gene-0.23-mRNA-1	aAeg_AAEL002322-PA	mDom_gi|557765530|ref|XP_005182464.1	gMor_GMOY005924_PA
sBull_snap_masked-Contig_602-processed-gene-0.54-mRNA-1	lCup_FF38_12270	dMel_NP_477441.1	aGamb_XP_319666.2	mDest_augustus_masked-A1.29-abinit-gene-9.1-mRNA-1	aAeg_AAEL012588-PA	mDom_gi|557778447|ref|XP_005188854.1	gMor_GMOY003284_PA
sBull_snap_masked-Contig_602-processed-gene-0.67-mRNA-1	lCup_FF38_12279	dMel_NP_648603.1	aGamb_XP_308101.3	mDest_augustus_masked-Un.15951-abinit-gene-0.1-mRNA-1	aAeg_AAEL000394-PA	mDom_gi|557765550|ref|XP_005182474.1	gMor_GMOY011243_PA
sBull_maker-Contig_430-snap-gene-0.19-mRNA-1	lCup_FF38_05916	dMel_NP_542438.1	aGamb_XP_309971.4	mDest_maker-X1.7-augustus-gene-39.69-mRNA-1	aAeg_AAEL003542-PA	mDom_gi|557751330|ref|XP_005175421.1	gMor_GMOY010397_PA
sBull_maker-Contig_16-snap-gene-5.4-mRNA-1	lCup_FF38_02560	dMel_NP_609711.1	aGamb_XP_317303.4	mDest_maker-A1.47-augustus-gene-11.50-mRNA-1	aAeg_AAEL013463-PA	mDom_gi|557777371|ref|XP_005188320.1	gMor_GMOY004494_PA
sBull_maker-Contig_16-snap-gene-7.32-mRNA-1	lCup_FF38_02554	dMel_NP_609631.1	aGamb_XP_318738.4	mDest_snap_masked-A1.21-abinit-gene-1.38-mRNA-1	aAeg_AAEL004995-PA	mDom_gi|557775210|ref|XP_005187251.1	gMor_GMOY005314_PA
sBull_maker-Contig_121-augustus-gene-1.3-mRNA-1	lCup_FF38_04998	dMel_NP_650917.1	aGamb_XP_315188.4	mDest_augustus_masked-X1.7-abinit-gene-94.8-mRNA-1	aAeg_AAEL011979-PA	mDom_gi|557784405|ref|XP_005191806.1	gMor_GMOY005540_PA
sBull_maker-Contig_275-snap-gene-1.4-mRNA-1	lCup_FF38_04727	dMel_NP_650520.1	aGamb_XP_321935.4	mDest_maker-A2.11-augustus-gene-6.69-mRNA-1	aAeg_AAEL006641-PA	mDom_gi|557782908|ref|XP_005191064.1	gMor_GMOY004767_PA
sBull_snap_masked-Contig_275-processed-gene-1.52-mRNA-1	lCup_FF38_01510	dMel_NP_732076.1	aGamb_XP_321018.5	mDest_snap_masked-X1Random.38-abinit-gene-2.24-mRNA-1	aAeg_AAEL006028-PA	mDom_gi|557782896|ref|XP_005191058.1	gMor_GMOY009018_PA
sBull_augustus_masked-Contig_220-processed-gene-0.18-mRNA-1	lCup_FF38_06683	dMel_NP_611400.1	aGamb_XP_309322.3	mDest_maker-A1.29-augustus-gene-9.79-mRNA-1	aAeg_AAEL006637-PA	mDom_gi|557764882|ref|XP_005182147.1	gMor_GMOY005350_PA
sBull_maker-Contig_8955-augustus-gene-0.3-mRNA-1	lCup_FF38_11105	dMel_NP_608833.1	aGamb_XP_319696.4	mDest_maker-A1.23-augustus-gene-1.37-mRNA-1	aAeg_AAEL006413-PA	mDom_gi|557762218|ref|XP_005180823.1	gMor_GMOY010022_PA
sBull_maker-Contig_106-snap-gene-0.2-mRNA-1	lCup_FF38_03380	dMel_NP_649089.2	aGamb_XP_309508.3	mDest_maker-A2.11-snap-gene-6.15-mRNA-1	aAeg_AAEL004425-PA	mDom_gi|557755157|ref|XP_005177320.1	gMor_GMOY001734_PA
sBull_maker-Contig_106-snap-gene-3.95-mRNA-1	lCup_FF38_03710	dMel_NP_569870.1	aGamb_XP_313084.3	mDest_augustus_masked-X1Random.3-abinit-gene-14.9-mRNA-1	aAeg_AAEL005934-PA	mDom_gi|557755128|ref|XP_005177306.1	gMor_GMOY010313_PA
sBull_maker-Contig_32-augustus-gene-7.1-mRNA-1	lCup_FF38_11691	dMel_NP_651715.1	aGamb_XP_317017.4	mDest_augustus_masked-X1Random.3-abinit-gene-10.5-mRNA-1	aAeg_AAEL002891-PA	mDom_gi|557759193|ref|XP_005179321.1	gMor_GMOY004580_PA
sBull_maker-Contig_32-snap-gene-7.23-mRNA-1	lCup_FF38_11688	dMel_NP_524549.1	aGamb_XP_310668.5	mDest_maker-X1Random.3-augustus-gene-10.54-mRNA-1	aAeg_AAEL005773-PA	mDom_gi|557774417|ref|XP_005186857.1	gMor_GMOY002824_PA
sBull_maker-Contig_38-augustus-gene-3.20-mRNA-1	lCup_FF38_04359	dMel_NP_649905.1	aGamb_XP_312823.5	mDest_maker-A2.8-augustus-gene-0.86-mRNA-1	aAeg_AAEL008366-PA	mDom_gi|557762705|ref|XP_005181066.1	gMor_GMOY009881_PA
sBull_maker-Contig_38-snap-gene-4.73-mRNA-1	lCup_FF38_04357	dMel_NP_649904.2	aGamb_XP_316696.4	mDest_maker-X2.16-augustus-gene-8.52-mRNA-1	aAeg_AAEL014096-PA	mDom_gi|755867913|ref|XP_005181064.2	gMor_GMOY009883_PA
sBull_maker-Contig_38-snap-gene-4.88-mRNA-1	lCup_FF38_04378	dMel_NP_524396.1	aGamb_XP_312392.3	mDest_maker-A2.12-augustus-gene-2.95-mRNA-1	aAeg_AAEL006135-PA	mDom_gi|755860541|ref|XP_005178552.2	gMor_GMOY001325_PA
sBull_maker-Contig_38-augustus-gene-4.47-mRNA-1	lCup_FF38_04374	dMel_NP_732262.1	aGamb_XP_321237.4	mDest_augustus_masked-X2.8-abinit-gene-20.10-mRNA-1	aAeg_AAEL013188-PA	mDom_gi|557757577|ref|XP_005178520.1	gMor_GMOY011462_PA
sBull_maker-Contig_107-snap-gene-1.53-mRNA-1	lCup_FF38_05838	dMel_NP_609548.1	aGamb_XP_320013.2	mDest_maker-Un.17588-augustus-gene-11.58-mRNA-1	aAeg_AAEL001223-PA	mDom_gi|557758405|ref|XP_005178930.1	gMor_GMOY001986_PA
sBull_maker-Contig_75-snap-gene-4.12-mRNA-1	lCup_FF38_01784	dMel_NP_725044.1	aGamb_XP_314136.4	mDest_maker-X1Random.8-augustus-gene-0.49-mRNA-1	aAeg_AAEL006282-PA	mDom_gi|557753611|ref|XP_005176550.1	gMor_GMOY008524_PA
sBull_maker-Contig_75-snap-gene-4.27-mRNA-1	lCup_FF38_02280	dMel_NP_610551.1	aGamb_XP_315882.4	mDest_augustus_masked-X2.4-abinit-gene-4.9-mRNA-1	aAeg_AAEL010520-PA	mDom_gi|557753559|ref|XP_005176524.1	gMor_GMOY005210_PA
sBull_maker-Contig_840-snap-gene-0.17-mRNA-1	lCup_FF38_13261	dMel_NP_648273.1	aGamb_XP_308003.4	mDest_maker-A1.41-augustus-gene-24.50-mRNA-1	aAeg_AAEL010060-PA	mDom_gi|557767241|ref|XP_005183311.1	gMor_GMOY006883_PA
sBull_maker-Contig_61-snap-gene-4.9-mRNA-1	lCup_FF38_02040	dMel_NP_001097824.1	aGamb_XP_317754.2	mDest_maker-A1.28-snap-gene-17.5-mRNA-1	aAeg_AAEL009252-PA	mDom_gi|755852627|ref|XP_005175925.2	gMor_GMOY004779_PA
sBull_maker-Contig_327-snap-gene-1.5-mRNA-1	lCup_FF38_02199	dMel_NP_477405.1	aGamb_XP_320685.3	mDest_maker-Un.17671-augustus-gene-0.19-mRNA-1	aAeg_AAEL002834-PB	mDom_gi|557754471|ref|XP_005176979.1	gMor_GMOY007131_PA
sBull_maker-Contig_132-augustus-gene-1.18-mRNA-1	lCup_FF38_02879	dMel_NP_648182.1	aGamb_XP_313190.5	mDest_augustus_masked-A2.11-abinit-gene-7.10-mRNA-1	aAeg_AAEL006236-PA	mDom_gi|557770991|ref|XP_005185158.1	gMor_GMOY004425_PA
sBull_maker-Contig_364-augustus-gene-1.23-mRNA-1	lCup_FF38_00561	dMel_NP_651005.1	aGamb_XP_319677.2	mDest_augustus_masked-X1Random.8-abinit-gene-21.1-mRNA-1	aAeg_AAEL004232-PA	mDom_gi|557782233|ref|XP_005190731.1	gMor_GMOY006468_PA
sBull_maker-Contig_1008-augustus-gene-0.26-mRNA-1	lCup_FF38_12175	dMel_NP_659573.1	aGamb_XP_321758.5	mDest_augustus_masked-A2.9-abinit-gene-9.2-mRNA-1	aAeg_AAEL003661-PA	mDom_gi|557752036|ref|XP_005175770.1	gMor_GMOY009365_PA
sBull_maker-Contig_7315-snap-gene-0.4-mRNA-1	lCup_FF38_07104	dMel_NP_648318.2	aGamb_XP_308326.4	mDest_maker-X2.13-augustus-gene-23.69-mRNA-1	aAeg_AAEL005326-PA	mDom_gi|557763044|ref|XP_005181235.1	gMor_GMOY011087_PA
sBull_maker-Contig_102-augustus-gene-3.23-mRNA-1	lCup_FF38_12748	dMel_NP_650284.2	aGamb_XP_313855.3	mDest_maker-Un.1540-augustus-gene-1.77-mRNA-1	aAeg_AAEL009308-PA	mDom_gi|557761730|ref|XP_005180583.1	gMor_GMOY000380_PA
sBull_maker-Contig_92-snap-gene-1.25-mRNA-1	lCup_FF38_11771	dMel_NP_649594.1	aGamb_XP_309625.4	mDest_augustus_masked-X1Random.8-abinit-gene-1.4-mRNA-1	aAeg_AAEL002563-PA	mDom_gi|557777113|ref|XP_005188192.1	gMor_GMOY000562_PA
sBull_augustus_masked-Contig_92-processed-gene-2.15-mRNA-1	lCup_FF38_11762	dMel_NP_651048.1	aGamb_XP_320986.2	mDest_maker-X1Random.8-snap-gene-0.14-mRNA-1	aAeg_AAEL010048-PA	mDom_gi|557769171|ref|XP_005184260.1	gMor_GMOY004839_PA
sBull_maker-Contig_92-snap-gene-4.16-mRNA-1	lCup_FF38_11728	dMel_NP_477481.1	aGamb_XP_320711.4	mDest_augustus_masked-Un.20744-abinit-gene-0.1-mRNA-1	aAeg_AAEL009412-PA	mDom_gi|557752695|ref|XP_005176095.1	gMor_GMOY007955_PA
